1 **Title: (112 characters)**

2 **Social play is critical for the development of prefrontal inhibitory synapses and**  
3 **cognitive flexibility in rats**

4

5

6

7 **Authors:**

8 Ate Bijlsma<sup>1,2</sup>, Azar Omrani<sup>1,3,4</sup>, Marcia Spoelder<sup>2,5</sup>, Jeroen P.H. Verharen<sup>2,3,6</sup>, Lisa Bauer<sup>1</sup>, Cosette

9 Cornelis<sup>2</sup>, Beleke de Zwart<sup>2</sup>, René van Dorland<sup>1</sup>, Louk J.M.J. Vanderschuren<sup>2,\*,#</sup>, Corette J. Wierenga<sup>1,\*,#</sup>

10

11 **# corresponding authors**

12

13

14

15 **Affiliations:**

16 <sup>1</sup> Department of Biology, Faculty of Science, Utrecht University, Utrecht, the Netherlands

17 <sup>2</sup> Department of Animals in Science and Society, Division of Behavioural Neuroscience, Faculty of

18 Veterinary Medicine, Utrecht University, Utrecht, the Netherlands

19 <sup>3</sup> Department of Translational Neuroscience, University Medical Center Utrecht, Utrecht, the

20 Netherlands

21 <sup>4</sup> current address: Department of CNS Diseases Research, Boehringer Ingelheim Pharma GmbH & Co KG,  
22 Biberach, Germany

23 <sup>5</sup> current address: Department of Cognitive Neuroscience, Donders Institute for Brain, Cognition and  
24 Behaviour, Radboud University Nijmegen Medical Centre, Nijmegen, the Netherlands

25 <sup>6</sup> current address: Helen Wills Neuroscience Institute, Department of Molecular and Cell Biology,  
26 University of California Berkeley, Berkeley, CA, USA

27

28 **Correspondence to:**

29 **Corette J. Wierenga** [c.j.wierenga@uu.nl](mailto:c.j.wierenga@uu.nl)

30 **Louk J.M.J. Vanderschuren** [l.j.m.j.vanderschuren@uu.nl](mailto:l.j.m.j.vanderschuren@uu.nl)

31

32 **Acknowledgements:** Supported by the Netherlands Organisation for Scientific Research (NWO)

33 ALWOP.2015.105 (LJMJV, CJW) and UU strategic theme Dynamics of Youth. We thank Daniëlle Counotte  
34 for preliminary experiments and Ruth Damsteegt for practical assistance.

35

36

37 **Author Contribution:** The study was conceived by CW and LV. Experiments were designed by AB, AO,

38 MS, LV and CW. Experiments were performed by AB, AO, MS, LB, RD, CC and BdW. Analysis was

39 performed by AB, AO, MS, JV, LB, BdW and CC. Manuscript was written by AB, LV and CW.

40

41

42

43 **Abstract – 216 words**

44

45 Sensory driven activity during early life is critical for setting up the proper connectivity of the sensory  
46 cortices. Here we ask if social play behavior, a particular form of social interaction that is highly abundant  
47 during post-weaning development, is equally important for setting up connections in the developing  
48 prefrontal cortex (PFC). Young rats were deprived from social play with peers for 3 weeks during the  
49 period in life when social play behavior normally peaks (P21-42; SPD rats), followed by resocialization until  
50 adulthood. We recorded synaptic currents in L5 cells in slices from medial PFC of adult SPD and control  
51 rats and observed that inhibitory synaptic currents were reduced in SPD slices, while excitatory synaptic  
52 currents were unaffected. This was associated with a decrease in perisomatic inhibitory synapses from  
53 parvalbumin-positive GABAergic cells. In parallel experiments, adult SPD rats achieved more reversals in  
54 a probabilistic reversal learning task (PRL), which depends on the integrity of the PFC. They appeared to  
55 use a different cognitive strategy than controls. One hour of intense play during SPD did not prevent the  
56 decrease in inhibitory synaptic inputs and had only a limited effect on behavioral outcomes in the PRL.  
57 Our data demonstrate the importance of unrestricted social play for the development of inhibitory  
58 synapses in the PFC and cognitive skills in adulthood.

59

60

## 61 **Introduction**

62 The developing brain requires proper external input to fine-tune activity and connectivity in neural  
63 circuits to ensure optimal functionality throughout life. This process has been extensively studied in the  
64 sensory cortices, and it is long known that sensory deprivation during development causes long-lasting  
65 deficits in sensory processing resulting from improper synaptic wiring (Hensch, 2005; Gainey and  
66 Feldman, 2017). However, how experience-dependent plasticity contributes to the development of  
67 other brain structures, such as the prefrontal cortex (PFC), remains largely unknown (Kolb et al., 2012;  
68 Larsen and Luna, 2018; Reh et al., 2020).

69 The PFC is important for higher cognitive, so-called executive functions (Miller and Cohen, 2001;  
70 Floresco et al., 2008), as well as the neural operations required during social interactions (Frith and Frith,  
71 2012; Rilling and Sanfey, 2012). By analogy of sensory cortex development, proper PFC development  
72 may require complex cognitive and social stimuli. Importantly, during the period when the PFC matures,  
73 i.e. in between weaning and early adulthood (Kolb et al., 2012), young animals display an abundance of  
74 an energetic form of social behavior known as social play behavior (Panksepp et al., 1984;  
75 Vanderschuren et al., 1997; Pellis and Pellis, 2009). Social play behavior involves PFC activity (van  
76 Kerkhof et al., 2013b), and lesions or inactivation of the PFC have been found to impair social play (Bell et  
77 al., 2009; van Kerkhof et al., 2013a). It is widely held that exploration and experimentation during social  
78 play facilitates the development of a rich behavioral repertoire, that allows an individual to quickly  
79 adapt in a changeable world. In this way, social play subserves the development of PFC-dependent skills  
80 such as flexibility, creativity, and decision-making (Spinka et al., 2001; Pellis and Pellis, 2009;  
81 Vanderschuren and Trezza, 2014).

82 Lack of social play experience during post-weaning development may cause long-lasting changes  
83 in PFC circuitry and function (Leussis et al., 2008; Bell et al., 2010; Baarendse et al., 2013; Vanderschuren  
84 and Trezza, 2014). However, the cellular mechanisms by which social play facilitates PFC development

85 remain elusive. It is well described that sensory deprivation induces specific alterations in inhibitory  
86 neurotransmission that affect adult sensory processing (Turrigiano and Nelson, 2004; Hensch, 2005). We  
87 therefore hypothesized that early life social experiences specifically shape PFC inhibition. Here we  
88 investigated how cognitive flexibility and inhibitory signaling are affected in the adult PFC when rats are  
89 deprived from social play during development.

90

## 91 **Results**

92 Rats were deprived of social play for a period of 3 weeks post-weaning (postnatal days 21-42),  
93 which is the period in life when social play is most abundant (Baenninger, 1967; Meaney and Stewart,  
94 1981; Panksepp, 1981) . Rats in the social play deprivation (SPD) group were separated from their cage  
95 mate by a plexiglass wall, which allowed smelling, hearing, seeing and communicating, but not physical  
96 interaction and playing. After the SPD period, the wall was removed and pair-wise social housing was  
97 maintained until adulthood when experiments were performed (postnatal week 8-10). Control (CTL) rats  
98 were housed in pairs during the entire period. We performed voltage-clamp recordings from layer 5  
99 (L5) pyramidal cells of the medial PFC (mPFC) in slices prepared from adult SPD and CTL rats to assess  
100 the impact of SPD on PFC circuitry development (Fig. 1A-C). We found that the frequency and amplitude  
101 of spontaneous inhibitory postsynaptic currents (sIPSCs) was reduced in SPD rats (Fig 1D, E). By contrast,  
102 spontaneous excitatory postsynaptic currents (sEPSCs) were unaffected (Fig. 1F, G). The frequency of  
103 miniature inhibitory currents (mIPSCs) was also reduced in SPD slices (Fig. 1H), while mIPSC amplitudes  
104 (Fig. 1I) were not affected. The reduction in mIPSC frequency in SPD slices was accompanied by an  
105 increase in the average rise time (Fig. 1J), suggesting that particularly mIPSCs with fast kinetics were lost.  
106 Decay kinetics (Fig. 1K) and intrinsic excitability (Fig. 2A-C) were unaffected. Together, these data  
107 indicate that SPD leads to selective reduction in GABAergic synaptic inputs onto L5 pyramidal cells in the  
108 adult mPFC.

109           A reduction in mIPSCs with fast rise times suggests that inhibitory synapses at perisomatic  
110 locations were affected. Perisomatic synapses are made by parvalbumin (PV) and cholecystinin (CCK)  
111 basket cells (Whissell et al., 2015), of which only the latter express the cannabinoid receptor 1 (CB1-R)  
112 (Katona et al., 1999). We performed immunohistochemistry on the mPFC of adult SPD and CTL rats and  
113 quantified the number of GAD67- and PV-positive cell bodies (Fig. 3A). The density of GAD67-positive  
114 interneurons (Fig. 3B) and PV-positive cells (Fig. 3C) in the mPFC was not different between SPD and CTL  
115 rats. We then quantified inhibitory synaptic markers around the soma of L5 pyramidal neurons, using  
116 NeuN staining to draw a narrow band around the soma of individual pyramidal neurons and analyzing  
117 the synaptic PV and CB1 puncta within this band (Fig. 4A-B; see Methods for details). The density of  
118 VGAT puncta was not different in SPD and CTL tissue, but the density of PV synapses (colocalizing with  
119 VGAT) was significantly lower in SPD tissue compared to CTL tissue (Fig. 4C). The density of CB1-R  
120 synapses was not altered. In addition, synaptic PV and CB1-R puncta intensity was decreased in SPD  
121 tissue (Fig. 4D). This reduction was specific as VGAT puncta intensity was similar in SPD and CTL tissue  
122 (Fig. 4D). Puncta size was not much affected, although synaptic CB1-R puncta were slightly larger in SPD  
123 tissue (Fig. 4E). We verified that somata of L5 pyramidal cells had similar size in SPD and CTL tissue (Fig.  
124 4F) and synaptic density was not correlated with cell size (Fig. 4G). Together, these data show that SPD  
125 results in a decrease in inhibitory synaptic input to L5 pyramidal cells in the adult PFC, with differential  
126 effects on perisomatic PV and CB1-R synapses.

127           In order to assess the impact of SPD on cognitive flexibility, a PFC-dependent probabilistic  
128 reversal learning task (PRL) was used (Fig. 5A, B) (Dalton et al., 2016; Verharen et al., 2020). In this task,  
129 responding on the 'correct' and 'incorrect' levers was rewarded on 80% and 20% of trials, respectively,  
130 and position of the 'correct' and 'incorrect' levers switched after 8 consecutive responses on the  
131 'correct' lever. Rats in the SPD and CTL groups readily acquired the task and achieved a comparable  
132 performance level in terms of rewards obtained (Fig. 5C). Remarkably, SPD rats completed more

133 reversals than CTL rats (Fig. 5D), indicating that cognitive performance in adult rats was altered after  
134 SPD.

135         Early behavioral studies have shown that behavioral performance after social isolation can be  
136 partially rescued by allowing the rats daily play for a short amount of time (Einon et al., 1978; Potegal  
137 and Einon, 1989). We therefore repeated the PRL experiments, but now added a second group of SPD  
138 rats which were allowed to play daily for 1 hour with their cage mate during the deprivation period  
139 (SPD1h). We quantified pinning and pouncing - the most characteristic social play behaviors in rats  
140 (Panksepp and Beatty, 1980; Vanderschuren et al., 1996) -, as well as social and non-social exploration  
141 during the play sessions of the SPD1h rats (Fig. 6A-D). The frequency of pins and pounces was much  
142 higher compared to socially housed rats of the same age, which typically show 1-2 pins per minute  
143 (Schneider et al., 2016; Stark and Pellis, 2021), and was comparable to rats in other studies that were  
144 isolated for 24 h, an isolation period that is known to induce maximal social play behavior (Niesink and  
145 Van Ree, 1989; Vanderschuren et al., 1995, 2008; Achterberg et al., 2016). Quantification of the social  
146 interactions showed that around 75 % of pins and pounces occurred in the first half hour of the session  
147 (Fig. 6E).

148         Consistent with our first observations (Fig. 5), rats in all three groups equally learned to perform  
149 this task (Fig. 7A). They achieved a comparable performance level, with only small differences in the  
150 number of earned rewards (Fig. 7B). Again, SPD rats completed more reversals compared to the CTL  
151 rats, and this was observed consistently across all sessions (Fig. 7C). Reversal completion of the SPD1h  
152 group resembled the SPD group during the initial sessions of the task, but their performance in later  
153 sessions was more comparable to the control group (Fig. 7C). To understand these differences between  
154 the groups in more detail, we assessed win-stay and lose-shift behavior. We observed a specific increase  
155 in win-stay behavior in SPD rats, but not in the SPD1h group (Fig. 7D). When we assessed this behavior  
156 over the course of the sessions (Fig. 7E), we observed more win-stay choices in the SPD group compared

157 to CTL rats consistently in all sessions. Intermediate behavior was observed in SPD1h rats, whereby their  
158 behavior resembled the SPD group in early sessions and the CTL group in later sessions. There was no  
159 difference between groups in their choices after non-rewarded trials (Fig. 7F, G).

160 We next performed trial-by-trial analysis of the behavioral data (Verharen et al., 2018, 2020) to  
161 reveal possible alterations in the component processes subserving probabilistic reversal learning. We  
162 compared different computational models to describe the behavioral choices of the rats. The simplest  
163 random model assumes that animals always randomly choose a lever to press. A family of three  
164 heuristic models assumes simple practical strategies to complete the task (e.g. win-stay; lose-shift, etc).  
165 Finally, the four Q learning models integrate sensitivity to positive and negative feedback, and weigh  
166 exploration versus exploitation (see Methods for details). The behavior of CTL rats was best described by  
167 a Q-learning model in all sessions (Fig. 8A, B left panel), but the SPD and SPD1h rats shifted towards  
168 behavior congruent with a simpler heuristic strategy as reversal learning progressed (Fig. 8A, B middle  
169 and right panel), showing a tendency to remain at the previously chosen lever. Thus, SPD rats, with or  
170 without daily playtimes, switched from a learning-based strategy to a more perseverative strategy,  
171 whereas CTL rats continued learning throughout training. These data indicate that juvenile SPD alters  
172 PFC function and cognitive flexibility in adulthood. Furthermore, 1hr daily play during SPD only partially  
173 restores the cognitive performance in SPD rats.

174 To check if the partial rescue in behavior of the SPD1h rats was due to a rescue of the inhibitory  
175 microcircuitry in the mPFC, we recorded miniature inhibitory currents (mIPSCs) in prefrontal slices from  
176 all 3 groups. Consistent with our earlier results (Fig 1H), a clear reduction in mIPSC frequency was found  
177 in the SPD group compared to CTL rats (Fig. 9B). This reduction was similar in the SPD and SPD1h slices,  
178 indicating that daily playtimes during the play deprivation period did not affect the development of PFC  
179 inhibition (Fig. 9B). Amplitudes of the events were not different between groups (Fig. 9C).



180 Our findings demonstrate that the organization of the adult GABAergic system in the mPFC of  
181 rats is robustly altered when rats are deprived of social play behavior during development, with  
182 important consequences for cognitive flexibility. The inclusion of daily play sessions during the SPD  
183 period failed to rescue the reduction in PFC GABAergic synapses and only partially restored the cognitive  
184 performance in a PFC-dependent PRL task.

185

## 186 **Discussion**

187 When they are young, rats, like most other mammalian species, display an abundance of a particular,  
188 highly rewarding and energetic form of social behavior, termed social play behavior (Panksepp et al.,  
189 1984; Vanderschuren et al., 2016; Pellis and Pellis, 2017). Playing with peers it thought to allow young  
190 animals to experiment with their behavioral repertoire, and to provide practice scenarios to obtain the  
191 social, cognitive and emotional skills to become capable adults who can easily navigate a changeable  
192 world (Spinka et al., 2001; Pellis and Pellis, 2009; Vanderschuren and Trezza, 2014; Larsen and Luna,  
193 2018). Social play enhances neuronal activity in a broad network of limbic and corticostriatal structures  
194 (Gordon et al., 2002, 2003; van Kerkhof et al., 2013b). This integrated neuronal activity is likely to induce  
195 synaptic plasticity in the PFC, analogous to the well-described experience-dependent maturation of  
196 cortical sensory circuits, which requires appropriate sensory activation during development (Hensch,  
197 2005; Gainey and Feldman, 2017). Our study investigates at the synaptic level how social play  
198 experience in juvenile rats – roughly equivalent to childhood in humans - contributes to maturation of  
199 PFC circuitry. Our data show that the experience of unrestricted juvenile social play is crucial to instruct  
200 the development of specific inhibitory connections in the PFC and to shape adaptive cognitive strategies  
201 in the adult brain.

202

203 We found that perisomatic inhibition onto L5 cells was reduced in the adult mPFC after SPD. We  
204 observed a ~30% reduction in mIPSC frequency, associated with a comparable reduction in perisomatic  
205 PV synapses. A preferential effect of SPD on perisomatic inhibition by PV-expressing cells parallels  
206 observations after sensory deprivation during development (Hensch et al., 1998; Jiao et al., 2006;  
207 Mowery et al., 2019; Reh et al., 2020). The reduced levels of PV and CB1 expression that we observed  
208 suggest reduced PV activity (Donato et al., 2013; Caballero et al., 2014) and altered endocannabinoid  
209 tone (Sciolino et al., 2010; Schneider et al., 2016) in the PFC after SPD. This may interfere with  
210 developmental plasticity of PFC circuitry (Caballero and Tseng, 2016) and affect cognitive capacities in  
211 adulthood (Donato et al., 2015). Importantly and resonating well with our present findings, a reduction  
212 in PFC inhibition has previously been linked to impaired cognitive flexibility (Gruber et al., 2010), and  
213 recently a direct link between PFC PV cell activity and social behavior was demonstrated (Bicks et al.,  
214 2020; Sun et al., 2020).

215 Our data reveal specific synaptic alterations in the prefrontal microcircuitry that may underlie altered  
216 cognitive strategies in animals deprived of juvenile social play. Importantly, after the temporary social  
217 isolation when they were young, the animals had ample opportunity for social interaction for several  
218 weeks before testing. However, even after weeks of unrestricted social interactions, pronounced  
219 changes in PFC function and cognition persisted. This emphasizes the importance of early post-weaning  
220 social play, consistent with earlier studies that identified this time window as a critical period for PFC  
221 maturation and behavioral development (Einon and Morgan, 1977; Hol et al., 1999; Lukkes et al., 2009;  
222 Kolb et al., 2012; Whitaker et al., 2013).

223 Adult rats which had experienced SPD displayed a different behavioral strategy in the probabilistic  
224 reversal learning task compared to CTL animals. CTL rats seemed to follow a sophisticated cognitive  
225 strategy which was well-described by a Q-learning model. Our findings indicate that SPD rats performed  
226 more reversals – but actually received the same number of rewards compared to CTL rats – by using a

227 simplified win-stay strategy, in which they relied less on feedback-driven learning, and more on  
228 perseveration-based heuristics. Such heuristics are thought to be cognitively less demanding (Christie  
229 and Schrater, 2015), and may therefore be preferred under certain conditions, especially if this does not  
230 lead to a reduction in reward. A similar increase in reversals was also reported after prelimbic mPFC  
231 inactivation (Dalton et al., 2016), suggesting that the mPFC may be less involved in PRL performance in  
232 SPD rats compared to CTL rats.

233 We observed that one hour of daily playtime during the deprivation period could not rescue the  
234 reduction in prefrontal IPSCs, and only partially restored behavior. Play is not displayed continuously by  
235 young rats, but appears in peaks of relatively short duration across the day (Melotti et al., 2014; Lampe  
236 et al., 2019). We observed that SPD1h rats played very intensely during the first 15-30 minutes of each  
237 play session resulting in a total amount of play that makes up a substantial fraction of the daily play that  
238 socially housed CTL rats show at this age (Baenninger, 1967; Vanderschuren et al., 2008; Schneider et  
239 al., 2016; Pellis and Pellis, 2017). However, it was not enough to prevent the reduction in prefrontal  
240 inhibition. This suggests the necessity of unrestricted, voluntarily elicited or repeated play such that  
241 short daily periods of intensive play cannot rescue the lasting effect of SPD on prefrontal inhibition and  
242 function. However, 1 hour of daily play partially rescued PRL performance. PRL performance depends on  
243 complex interactions between several component processes, including the sensitivity to positive and  
244 negative feedback, response persistence and exploration versus exploitation, each of which requires  
245 functional activity in distinct PFC regions (Verharen et al., 2018, 2020). Our observation that the  
246 behavior of SPD1hr fell in between SPD and CTL rats, while their reduction in mPFC inhibition was similar  
247 to SPD rats, suggests that the partial rescue of behavior involves compensatory changes in other brain  
248 areas, but further studies will be needed to elucidate this.

249 Together, our results demonstrate a key role for unrestricted juvenile social play in the development of  
250 perisomatic inhibition in the PFC, and PFC-dependent cognitive flexibility.

251

## 252 **Figure Legends**

### 253 **Figure 1. Reduced prefrontal inhibition in L5 pyramidal cells after social play deprivation**

254 (A) Schematic diagram depicting the recording site in the mPFC. (B) DIC image of L5 cells in the mPFC  
255 with the recording electrode (grey lines). Scale bar is 20  $\mu\text{m}$ . (C) Example traces of spontaneous IPSCs  
256 (sIPSCs) in L5 pyramidal cells in slices from control (CTL) and SPD rats. (D, E) Frequency (D) and  
257 amplitude (E) of sIPSCs in CTL and SPD slices ( $p = 0.002$  and  $p = 0.03$ ; T test). (F, G) Frequency (F) and  
258 amplitude (G) of spontaneous EPSCs ( $p = 0.27$  and  $p = 0.35$ ; T test). (H, I) Frequency (H) and amplitude (I)  
259 of miniature IPSCs ( $p < 0.0005$  and  $p = 0.50$ ; T test). (J) Rise time of mIPSCs ( $p = 0.0008$ ; T test). (K) Decay  
260 time of mIPSCs ( $p = 0.40$ ; T test). Data from 15 CTL and 13 SPD brain slices (6 rats per group). Statistical  
261 range: \*  $p < 0.05$ ; \*\*  $p < 0.01$ ; \*\*\*  $p < 0.001$

262

### 263 **Figure 2. Passive membrane properties of L5 cells are similar in SPD and CTL slices**

264 (A) Resting potential of L5 pyramidal neurons in CTL and SPD slices ( $p = 0.97$ ; T test). (B) Input resistance  
265 ( $p = 0.61$ ; MW test). (C) Number of action potentials after current injections in CTL and SPD neurons ( $p =$   
266  $0.58$ ; 2w ANOVA, condition). Data in A is from 20 CTL and 22 SPD cells; in B from 14 CTL and 12 SPD cells;  
267 in C from 19 CTL and 22 SPD cells.

268

### 269 **Figure 3. Interneuron density is similar in CTL and SPD tissue**

270 (A) Representative confocal image of NeuN, GAD67 and PV positive neurons in prelimbic cortex layers.  
271 Borders between layers are denoted by the dashed lines. Scale bar is 10  $\mu\text{m}$ . (B) Left: The average  
272 density of GAD67-positive cells in the mPFC over all layers ( $p = 0.19$ ; T test); right: GAD67 cell density in  
273 Layer 1 ( $p = 0.95$ ; T test), Layer 2/3 ( $p = 0.19$ ; T test) and Layer 5 ( $p = 0.15$ ; T test). (C) Left: The average  
274 density of PV-positive cells in the mPFC over all layers ( $p = 0.33$ ; T test); right: PV cell density in Layer 1

275 (p = 0.90; MW test), Layer 2/3 (p = 0.12; T test) and Layer 5 (p = 0.85; T test). Data in B and C from 6 CTL  
276 and 6 SPD rats. For each rat two measurements (from both hemispheres) were included.

277

278

#### 279 **Figure 4. Reduction in perisomatic inhibitory synapses after SPD**

280 (A, B) Representative confocal images for VGAT, PV, CB1-R and NeuN immunostaining. Scale bar is 1  $\mu$ m.

281 (C) A 1.5  $\mu$ m band around the soma was drawn based on the NeuN staining. Individual puncta were

282 selected after thresholding Only PV and CB1-R puncta that co-localized with VGAT were considered

283 synaptic puncta. (D) Summary of the selected VGAT, PV and CB1-R puncta from C. (E) The density of

284 synaptic VGAT, PV and CB1-R puncta (VGAT p = 0.19; PV p = 0.02; CB1-R p = 0.36) (F) The mean intensity

285 of synaptic puncta (VGAT p = 0.51; PV p < 0.0005; CB1-R p = 0.02) (G) The mean area of synaptic puncta

286 (VGAT p = 0.93; PV p = 0.12; CB1-R p = 0.05) (H) Soma size of L5 pyramidal cells (p = 0.20; T test). (I)

287 Correlation between L5 soma size and VGAT synaptic puncta density. Data in E-I from 49 CTL cells and 34

288 SPD cells (6 rats per group, 2 hemispheres). Statistical range: \* p<0.05; \*\* p<0.01; \*\*\* p<0.001.

289

#### 290 **Figure 5. Altered PRL performance after SPD**

291 (A) Probabilistic reversal learning task design. Reversals occur when the rat has pressed the high

292 probability lever 8 consecutive times. (B) Representation of the first 100 lever presses of an example rat

293 during one of the sessions. Green and red dots represent rewarded and unrewarded lever presses

294 respectively. A reversal is indicated by the change of the high probability lever (Trial 24, 59, 75 and 84).

295 (C) Average number of rewards for CTL and SPD rats (p = 0.16; T test). (D) Average number of reversals

296 (p = 0.001; T test). Data in C and D from 12 CTL and 12 SPD rats. Statistical range: \*\* p > 0.01.

297

#### 298 **Figure 6. Social behavior during 1-hour play sessions.**

299 (A, B) The frequency of (A) pinning and (B) pouncing of the SPD1h rats during the 1-hour play sessions  
300 per day. (C, D) The time spent in (C) social and (D) non-social exploration. Each grey line represents a  
301 pair of rats with the colored line representing the groups' average. (E, F) The behavioral readouts of  
302 social play are expressed as fraction of the total. For both (E) pinning and (F) pouncing, the amount was  
303 separated in bins of 15 mins (For statistics see statistical table 1). Data from 10 couples of SPD1h rats.  
304

### 305 **Figure 7. Behavioral analysis of altered PRL performance after SPD**

306 (A) Number of correct and incorrect lever presses per session for CTL, SPD and SPD1h rats. (B) Number  
307 of sucrose rewards earned per session. (C) Normalized number of reversals per session. (D) Normalized  
308 average win-stay responses. (E) Normalized win-stay responses per session. (F) Normalized average lose-  
309 shift responses. (G) Normalized lose-shift responses per session. For statistics see statistical table 1. Data  
310 from 24 CTL, 24 SPD and 12 SPD1h rats (including CTL and SPD rats from fig. 5). Statistical range: \*  
311  $p < 0.05$ ; \*\*  $p < 0.01$ ; \*\*\*  $p < 0.001$

312

### 313 **Figure 8. Trial-by-trial analysis of PRL performance.**

314 (A) Exceedance probability for different families of computational models (Random choice, Heuristics  
315 and Q-learning families) based on Bayesian model selection for the three groups (CTL, SPD and SPD1h  
316 rats). (B) Exceedance probability for random and specific heuristic (Win-stay/Lose-shift (WSLS), Win-  
317 stay/Lose-random (WSLR), Random + stickiness) and Q-learning family models (Q-Learning single, dual,  
318 dual + stickiness, Rescorla-Wagner-Pearce-Hall (RWPH)).

319

### 320 **Figure 9. Reduced prefrontal inhibition in L5 pyramidal cells in SPD and SPD1h slices.**

321 (A) Frequency of mIPSCs in CTL, SPD and SPD1h slices (ANOVA  $p = 0.0049$ , Tukey's: CTL vs SPD  $p = 0.011$ ;  
322 CTL vs SPD1h  $p = 0.017$ ; SPD vs SPD1h  $p = 0.99$ ). (B) Amplitude of mIPSCs in CTL, SPD and SPD1h slices

323 (ANOVA  $p = 0.29$ ). Data from 12 CTL, 10 SPD and 9 SPD1h cells (6 rats per group). Statistical range: \*  $p <$   
324 0.05.

325

326

## 327 **References**

328 Achterberg EJM, Van Kerkhof LWM, Servadio M, Van Swieten MMH, Houwing DJ, Aalderink M, Driel N

329 V., Trezza V, Vanderschuren LJMJ (2016) Contrasting Roles of Dopamine and Noradrenaline in the

330 Motivational Properties of Social Play Behavior in Rats. *Neuropsychopharmacology* 41:858–868

331 Available at: <http://dx.doi.org/10.1038/npp.2015.212>.

332 Baarendse PJJ, Counotte DS, O'Donnell P, Vanderschuren LJMJ (2013) Early social experience is critical

333 for the development of cognitive control and dopamine modulation of prefrontal cortex function.

334 *Neuropsychopharmacology* 38:1485–1494 Available at:

335 <http://www.ncbi.nlm.nih.gov/pubmed/23403694> [Accessed September 4, 2013].

336 Baenninger LP (1967) Comparison of behavioural development in socially isolated and grouped rats.

337 *Anim Behav* 15:312–323.

338 Bari A, Theobald DE, Caprioli D, Mar AC, Aidoo-Micah A, Dalley JW, Robbins TW (2010) Serotonin

339 modulates sensitivity to reward and negative feedback in a probabilistic reversal learning task in

340 rats. *Neuropsychopharmacology* 35:1290–1301 Available at:

341 <http://www.pubmedcentral.nih.gov/articlerender.fcgi?artid=3055347&tool=pmcentrez&rendertyp>

342 [e=abstract](http://www.pubmedcentral.nih.gov/articlerender.fcgi?artid=3055347&tool=pmcentrez&rendertyp) [Accessed September 23, 2013].

343 Bell HC, McCaffrey DR, Forgie ML, Kolb B, Pellis SM (2009) The role of the medial prefrontal cortex in the

344 play fighting of rats. *Behav Neurosci* 123:1158–1168 Available at:

345 <http://www.ncbi.nlm.nih.gov/pubmed/20001100> [Accessed September 26, 2013].

346 Bell HC, Pellis SM, Kolb B (2010) Juvenile peer play experience and the development of the orbitofrontal

347 and medial prefrontal cortices. *Behav Brain Res* 207:7–13 Available at:  
348 <http://www.ncbi.nlm.nih.gov/pubmed/19786051> [Accessed September 23, 2013].

349 Bicks LK, Yamamuro K, Flanigan ME, Kim JM, Kato D, Lucas EK, Koike H, Peng MS, Brady DM,  
350 Chandrasekaran S, Norman KJ, Smith MR, Clem RL, Russo SJ, Akbarian S, Morishita H (2020)  
351 Prefrontal parvalbumin interneurons require juvenile social experience to establish adult social  
352 behavior. *Nat Commun* 11:1003.

353 Caballero A, Flores-Barrera E, Cass DK, Tseng KY (2014) Differential regulation of parvalbumin and  
354 calretinin interneurons in the prefrontal cortex during adolescence. *Brain Struct Funct* 219:395–  
355 406.

356 Caballero A, Tseng KY (2016) GABAergic Function as a Limiting Factor for Prefrontal Maturation during  
357 Adolescence. *Trends Neurosci* 39:441–448 Available at:  
358 <http://dx.doi.org/10.1016/j.tins.2016.04.010>.

359 Christie ST, Schrater P (2015) Cognitive cost as dynamic allocation of energetic resources. *Front Neurosci*  
360 9:1–15.

361 Dalton GL, Wang NY, Phillips AG, Floresco SB (2016) Multifaceted Contributions by Different Regions of  
362 the Orbitofrontal and Medial Prefrontal Cortex to Probabilistic Reversal Learning. *J Neurosci*  
363 36:1996–2006.

364 Donato F, Chowdhury A, Lahr M, Caroni P (2015) Early- and Late-Born Parvalbumin Basket Cell  
365 Subpopulations Exhibiting Distinct Regulation and Roles in Learning. *Neuron* 85:770–786 Available  
366 at: <http://dx.doi.org/10.1016/j.neuron.2015.01.011>.

367 Donato F, Rompani SB, Caroni P (2013) Parvalbumin-expressing basket-cell network plasticity induced by  
368 experience regulates adult learning. *Nature* 504:272–276 Available at:  
369 <http://www.ncbi.nlm.nih.gov/pubmed/24336286> [Accessed January 9, 2014].

370 Einon DF, Morgan MJ (1977) Critical period for social isolation. *Dev Psychobiol* 10:123–132.



- 371 Einon DF, Morgan MJ, Kibbler CC (1978) Brief periods of socialization and later behavior in the rat. *Dev*  
372 *Psychobiol* 11:213–225.
- 373 Floresco SB, Block AE, Tse MTL (2008) Inactivation of the medial prefrontal cortex of the rat impairs  
374 strategy set-shifting, but not reversal learning, using a novel, automated procedure. *Behav Brain*  
375 *Res* 190:85–96 Available at: <http://www.ncbi.nlm.nih.gov/pubmed/18359099> [Accessed  
376 September 23, 2013].
- 377 Frith CD, Frith U (2012) Mechanisms of Social Cognition. *Annu Rev Psychol* 63:287–313.
- 378 Gainey MA, Feldman DE (2017) Multiple shared mechanisms for homeostatic plasticity in rodent  
379 somatosensory and visual cortex. *Philos Trans R Soc B Biol Sci* 372:20160157.
- 380 Gordon NS, Burke S, Akil H, Watson SJ, Panksepp J (2003) Socially-induced brain ‘fertilization’: play  
381 promotes brain derived neurotrophic factor transcription in the amygdala and dorsolateral frontal  
382 cortex in juvenile rats. *Neurosci Lett* 341:17–20 Available at:  
383 <http://linkinghub.elsevier.com/retrieve/pii/S0304394003001587> [Accessed April 8, 2014].
- 384 Gordon NS, Kollack-Walker S, Akil H, Panksepp J (2002) Expression of c-fos gene activation during rough  
385 and tumble play in juvenile rats. *Brain Res Bull* 57:651–659.
- 386 Gruber AJ, Calhoon GG, Shusterman I, Schoenbaum G, Roesch MR, O’Donnell P (2010) More is less: a  
387 disinhibited prefrontal cortex impairs cognitive flexibility. *J Neurosci* 30:17102–17110.
- 388 Hensch T, Fagiolini M, Mataga N, Stryker M, Baekkeskov S, Kash S (1998) Local GABA circuit control of  
389 experience-dependent plasticity in developing visual cortex. *Science* (80- ) 282:1504–1508.
- 390 Hensch TK (2005) Critical period plasticity in local cortical circuits. *Nat Rev Neurosci* 6:877–888 Available  
391 at: <http://www.ncbi.nlm.nih.gov/pubmed/16261181>.
- 392 Hol T, Van den Berg CL, Van Ree JM, Spruijt BM (1999) Isolation during the play period in infancy  
393 decreases adult social interactions in rats. *Behav Brain Res* 100:91–97 Available at:  
394 <http://www.ncbi.nlm.nih.gov/pubmed/10212056>.

- 395 Jiao Y, Zhang C, Yanagawa Y, Sun QQ (2006) Major effects of sensory experiences on the neocortical  
396 inhibitory circuits. *J Neurosci* 26:8691–8701.
- 397 Katona I, Sperlagh B, Sık A, Kalfalvi A, Vizi ES, Mackie K, Freund TF (1999) Presynaptically located CB1  
398 cannabinoid receptors regulate GABA release from axon terminals of specific hippocampal  
399 interneurons. *J Neurosci* 19:4544–4558.
- 400 Kolb B, Mychasiuk R, Muhammad A, Li Y, Frost DO, Gibb R (2012) Experience and the developing  
401 prefrontal cortex. *Proc Natl Acad Sci U S A* 109 Suppl2:17186–17193 Available at:  
402 [http://www.pubmedcentral.nih.gov/articlerender.fcgi?artid=3477383&tool=pmcentrez&rendertyp](http://www.pubmedcentral.nih.gov/articlerender.fcgi?artid=3477383&tool=pmcentrez&rendertype=abstract)  
403 [e=abstract](http://www.pubmedcentral.nih.gov/articlerender.fcgi?artid=3477383&tool=pmcentrez&rendertype=abstract) [Accessed September 22, 2013].
- 404 Lampe JF, Ruchti S, Burman O, Wurbel H, Melotti L (2019) Play like me: Similarity in playfulness  
405 promotes social play. *PLoS One* 14:1–21.
- 406 Larsen B, Luna B (2018) Adolescence as a neurobiological critical period for the development of higher-  
407 order cognition. *Neurosci Biobehav Rev* 94:179–195 Available at:  
408 <https://doi.org/10.1016/j.neubiorev.2018.09.005>.
- 409 Leussis MP, Lawson K, Stone K, Andersen SL (2008) The Enduring Effects of an Adolescent Social Stressor  
410 on Synaptic Density , Part II: Poststress Reversal of Synaptic Loss in the Cortex by Adinazolam and  
411 MK-801. *Synapse* 62:185–192.
- 412 Lukkes JL, Watt MJ, Lowry CA, Forster GL (2009) Consequences of post-weaning social isolation on  
413 anxiety behavior and related neural circuits in rodents. *Front Behav Neurosci* 3:18 Available at:  
414 [http://www.pubmedcentral.nih.gov/articlerender.fcgi?artid=2737489&tool=pmcentrez&rendertyp](http://www.pubmedcentral.nih.gov/articlerender.fcgi?artid=2737489&tool=pmcentrez&rendertype=abstract)  
415 [e=abstract](http://www.pubmedcentral.nih.gov/articlerender.fcgi?artid=2737489&tool=pmcentrez&rendertype=abstract) [Accessed September 4, 2013].
- 416 Meaney MJ, Stewart J (1981) A descriptive study of social development in the rat (*Rattus norvegicus*).  
417 *Anim Behav* 29:34–45.
- 418 Melotti L, Bailoo J, Murphy E, Burman O, Wurbel H (2014) Play in Rats: Association across Contexts and

- 419 Types, and Analysis of Structure. *Anim Behav Cogn* 1:489–501.
- 420 Miller EK, Cohen JD (2001) An integrative theory of prefrontal cortex function. *Annu Rev Neurosci*  
421 24:167–202.
- 422 Mowery TM, Caras ML, Hassan SI, Wang DJ, Dimidschstein J, Fishell G, Sanes DH (2019) Preserving  
423 inhibition during developmental hearing loss rescues auditory learning and perception. *J Neurosci*  
424 39:8347–8361.
- 425 Niesink RJM, Van Ree JM (1989) Involvement of opioid and dopaminergic systems in isolation-induced  
426 pinning and social grooming of young rats. *Neuropharmacology* 28:411–418.
- 427 Panksepp J (1981) The ontogeny of play in rats. *Dev Psychobiol* 14:327–332.
- 428 Panksepp J, Beatty WW (1980) Social deprivation and play in rats. *Behav Neural Biol* 30:197–206.
- 429 Panksepp J, Siviy S, Normansell L (1984) The psychobiology of play: Theoretical and methodological  
430 perspectives. *Neurosci Biobehav Rev* 8:465–492.
- 431 Pellis SM, Pellis V (2009) *The playful brain: venturing to the limits of neuroscience*. London, UK:  
432 Oneworld Publications.
- 433 Pellis SM, Pellis VC (2017) What is play fighting and what is it good for? *Learn Behav* 45:355–366.
- 434 Penny WD, Stephan KE, Daunizeau J, Rosa MJ, Friston KJ, Schofield TM, Leff AP (2010) Comparing  
435 families of dynamic causal models. *PLoS Comput Biol* 6.
- 436 Potegal M, Einon D (1989) Aggressive behaviors in adult rats deprived of playfighting experience as  
437 juveniles. *Dev Psychobiol* 22:159–172.
- 438 Reh RK, Dias BG, Nelson III CA, Kaufer D, Werker JF, Kolb B, Levine JD, Hensch TK (2020) Critical period  
439 regulation across multiple timescales. *Proc Natl Acad Sci* 201820836:online ahead of print.
- 440 Rescorla RA, Wagner AR (1972) A theory of Pavlovian conditioning: Variations in the effectiveness of  
441 reinforcement and nonreinforcement, *Classical Conditioning II* (Black AH, Prokasy WF, eds).  
442 Appleton-Century-Crofts.

- 443 Rigoux L, Stephan KE, Friston KJ, Daunizeau J (2014) Bayesian model selection for group studies -  
444 Revisited. *Neuroimage* 84:971–985 Available at:  
445 <http://dx.doi.org/10.1016/j.neuroimage.2013.08.065>.
- 446 Rilling J, Sanfey A (2012) The neuroscience of social decision-making. *Annu Rev Psychol* 62:23–48.
- 447 Schneider P, Bindila L, Schmahl C, Bohus M, Meyer-Lindenberg A, Lutz B, Spanagel R, Schneider M (2016)  
448 Adverse social experiences in adolescent rats result in enduring effects on social competence, pain  
449 sensitivity and endocannabinoid signaling. *Front Behav Neurosci* 10:1–16.
- 450 Sciolino NR, Bortolato M, Eisenstein SA, Fu J, Oveisi F, Hohmann AG, Piomelli D (2010) Social isolation  
451 and chronic handling alter endocannabinoid signaling and behavioral reactivity to context in adult  
452 rats. *Neuroscience* 168:371–386 Available at:  
453 <http://dx.doi.org/10.1016/j.neuroscience.2010.04.007>.
- 454 Spinka M, Newberry RC, Bekoff M (2001) Mammalian play: training for the unexpected. *Q Rev Biol*  
455 76:141–168 Available at: <http://www.ncbi.nlm.nih.gov/pubmed/11409050> [Accessed September  
456 23, 2013].
- 457 Stark RA, Pellis SM (2021) Using the ‘stranger test’ to assess social competency in adult female Long  
458 Evans rats reared with a Fischer 344 partner. *Behav Processes* 192.
- 459 Sun Q, Li X, Li A, Zhang J, Ding Z, Gong H, Luo Q (2020) Ventral Hippocampal-Prefrontal Interaction  
460 Affects Social Behavior via Parvalbumin Positive Neurons in the Medial Prefrontal Cortex. *iScience*  
461 23:100894 Available at: <https://doi.org/10.1016/j.isci.2020.100894>.
- 462 Turrigiano GG, Nelson SB (2004) Homeostatic plasticity in the developing nervous system. *Nat Rev*  
463 *Neurosci* 5:97–107 Available at: <http://www.ncbi.nlm.nih.gov/pubmed/14735113>.
- 464 van Kerkhof LW, Damsteegt R, Trezza V, Voorn P, Vanderschuren LJ (2013a) Social Play Behavior in  
465 Adolescent Rats is Mediated by Functional Activity in Medial Prefrontal Cortex and Striatum.  
466 *Neuropsychopharmacology* 38:1899–1909 Available at:

- 467 <http://www.ncbi.nlm.nih.gov/pubmed/23568326> [Accessed September 9, 2013].
- 468 van Kerkhof LWM, Trezza V, Mulder T, Gao P, Voorn P, Vanderschuren LJMJ (2013b) Cellular activation  
469 in limbic brain systems during social play behaviour in rats. *Brain Struct Funct* 219:1181–1211  
470 Available at: <http://www.ncbi.nlm.nih.gov/pubmed/23670540> [Accessed September 16, 2013].
- 471 Vanderschuren LJ, Niesink RJ, Van Ree JM (1997) The neurobiology of social play behavior in rats.  
472 *Neurosci Biobehav Rev* 21:309–326 Available at: <http://www.ncbi.nlm.nih.gov/pubmed/9168267>.
- 473 Vanderschuren LJMJ, Achterberg EJM, Trezza V (2016) The neurobiology of social play and its rewarding  
474 value in rats. *Neurosci Biobehav Rev* 70:86–105.
- 475 Vanderschuren LJMJ, Spruijt BM, Hol T, Niesink RJM, Ree JM Van (1996) Sequential analysis of social play  
476 behavior in juvenile rats: effects of morphine. *Behav Brain Res* 72:89–95 Available at: [http://ac.els-  
477 cdn.com.proxy.lib.iastate.edu/0166432896000605/1-s2.0-0166432896000605-  
478 main.pdf?\\_tid=52955e66-09ca-11e7-9d5e-  
479 00000aab0f26&acdnat=1489615203\\_02c50fa56edfb8bf953ac115cb2b0297](http://ac.els-cdn.com.proxy.lib.iastate.edu/0166432896000605/1-s2.0-0166432896000605-main.pdf?_tid=52955e66-09ca-11e7-9d5e-00000aab0f26&acdnat=1489615203_02c50fa56edfb8bf953ac115cb2b0297).
- 480 Vanderschuren LJMJ, Spruijt BM, Van Ree JM, Niesink RJM (1995) Effects of morphine on different  
481 aspects of social play in juvenile rats. *Psychopharmacology (Berl)* 117:225–231.
- 482 Vanderschuren LJMJ, Trezza V (2014) What the laboratory rat has taught us about social play behavior:  
483 role in behavioral development and neural mechanisms. *Curr Top Behav Neurosci* 16:189–212.
- 484 Vanderschuren LJMJ, Trezza V, Griffioen-Roose S, Schiepers OJG, Van Leeuwen N, De Vries TJ,  
485 Schoffelmeer ANM (2008) Methylphenidate disrupts social play behavior in adolescent rats.  
486 *Neuropsychopharmacology* 33:2946–2956.
- 487 Verharen JPH, De Jong JW, Roelofs TJM, Huffels CFM, Van Zessen R, Luijendijk MCM, Hamelink R,  
488 Willuhn I, Den Ouden HEM, Van Der Plasse G, Adan RAH, Vanderschuren LJMJ (2018) A neuronal  
489 mechanism underlying decision-making deficits during hyperdopaminergic states. *Nat Commun*  
490 9:1–15.

491 Verharen JPH, Ouden HEM den, Adan RAH, Vanderschuren LJMJ (2020) Modulation of value-based  
492 decision making behavior by subregions of the rat prefrontal cortex. *Psychopharmacology*  
493 (Berl):doi: 10.1007/s00213-020-05454-7.

494 Whissell PD, Cajanding JD, Fogel N, Kim JC (2015) Comparative density of CCK- and PV-GABA cells within  
495 the cortex and hippocampus. *Front Neuroanat* 9:1–16.

496 Whitaker LR, Degoulet M, Morikawa H (2013) Social deprivation enhances VTA synaptic plasticity and  
497 drug-induced contextual learning. *Neuron* 77:335–345 Available at:  
498 <http://www.ncbi.nlm.nih.gov/pubmed/23352169> [Accessed August 12, 2013].

499  
500

## 501 **Methods**

502

### 503 **Animals and housing conditions**

504 All experimental procedures were approved by the Animal Ethics Committee of Utrecht University and  
505 the Dutch Central Animal Testing Committee and were conducted in accordance with Dutch (Wet op de  
506 Dierproeven, 1996; Herziene Wet op de Dierproeven, 2014) and European legislation (Guideline  
507 86/609/EEC; Directive 2010/63/EU). Male Lister Hooded rats were obtained from Charles River  
508 (Germany) on postnatal day (P) 14 in litters with nursing mothers. All rats were subject to a reversed  
509 12:12h light-dark cycle with ad libitum access to water and food. Rats were weaned on P21 and were  
510 either subjected to one of the social play deprivation (SPD and SPD1h) groups or the control (CTL) group.  
511 Control (CTL) rats were housed in pairs during the entire period. SPD rats were pair-housed with a rat  
512 from a different mother. During P21 to P42 a transparent Plexiglas divider containing small holes was  
513 placed in the middle of their home cage creating two separate but identical compartments. SPD rats  
514 were therefore able to see, smell and hear one another but they were unable to physically socially  
515 engage. SPD1h animals were housed similarly to the SPD group but were allowed to socially interact  
516 with their cage mate for 1 hour per day. Social interaction sessions took place in a Plexiglas arena of 40 x  
517 40 x 60 cm (l x w x h) with approximately 2 cm of wood shavings. The social interaction sessions were  
518 recorded and the behavior was manually scored per pair using the Observer XT 15 software (Noldus  
519 Information Technology BV, Wageningen, The Netherlands). Four behaviors were scored:  
520 - Frequency of pinning: one animal lying with its dorsal surface on the floor with the other animal  
521 standing over it.  
522 - Frequency of pouncing: one animal attempts to nose/rub the nape of the neck of the partner.  
523 - Time spent in social exploration: one animal sniffing or grooming any part of the partner's body.  
524 - Time spent in non-social exploration: the animals exploring the cage or walk around.

525 A total of 10 pairs were recorded during their social interaction sessions. Four of these were eventually  
526 used for the electrophysiology experiments while the other six couples were used for behavioral testing.

527 On P42, the Plexiglas divider was removed and SPD and SPD1h rats were housed in pairs for the  
528 remainder of the experiment. All rats were housed in pairs for at least 4 weeks until early adulthood (10  
529 weeks of age) after which experimentation began. All experiments were conducted during the active  
530 phase of the animals (10:00 - 17:00). One week before the start of behavioral testing, the rats were  
531 subjected to food-restriction and were maintained at 85% of their free-feeding weight for the duration  
532 of the behavioral experiment. Rats were provided with ~ 20 sucrose pellets (45mg, BioServ) in their  
533 home cage for two subsequent days before their first exposure to the operant conditioning chamber to  
534 reduce potential food neophobia. Rats were weighed and handled at least once a week throughout the  
535 course of the experiment.

536

### 537 **Probabilistic reversal learning**

538 *Apparatus:* Behavioral testing was conducted in operant conditioning chambers (Med Associates, USA)  
539 enclosed in sound-attenuating cubicles equipped with a ventilation fan. Two retractable levers were  
540 located on either side of a central food magazine into which sugar pellets could be delivered via a  
541 dispenser. A LED cue light was located above each retractable lever. A white house light was mounted in  
542 the top-center of the wall opposite the levers. Online control of the apparatus and data collection was  
543 performed using MED-PC (Med Associates) software.

544 *Pre-training:* Rats were first habituated once to the operant chamber for 30 min in which the house light  
545 was illuminated and 50 sucrose rewards were randomly delivered into the magazine with an average  
546 inter-trial interval of 15 s between reward deliveries. On the subsequent days, the rats were trained for  
547 30 min under a Fixed-Ratio 1 (FR1) schedule of reinforcement for a minimum of three consecutive  
548 sessions. The session started with the illumination of the house light and the insertion of both levers,



549 which remained inserted for the remainder of the session. One of the two levers was the 'correct' lever  
550 rendering a reward when pressed, whereas pressing the other lever had no consequences. There was no  
551 limit other than time on the amount of times a rat could press the 'correct' lever. If the rat obtained 50  
552 or more rewards in a session it was required to press the other lever the following day. If it obtained less  
553 than 50 rewards the rat was tested on the same schedule the next day. A trial started with an inter-trial-  
554 interval (ITI) of 5 s with the chamber in darkness, followed by the illumination of the house-light and the  
555 insertion of one of the two levers into the chamber. A response within 30 s on the inserted lever  
556 resulted in the delivery of a reward. If the rat failed to respond on the lever within 30 s, the lever  
557 retracted and the trial was scored as an omission. Rats were trained for ~ 3-4 days to a criterion of at  
558 least 50 rewards and had to perform a lever press in more than 80% of the trials before progressing to  
559 the probabilistic reversal learning.

560 *Probabilistic reversal learning:* The protocol used for this task was modified from those of previous  
561 studies (Bari et al., 2010; Dalton et al., 2016; Verharen et al., 2020). At the start of each session one of  
562 the two levers was randomly selected to be 'correct' and the other 'incorrect'. A response on the  
563 'correct' lever resulted in the delivery of a reward on 80% of the trials, whereas a response on the  
564 'incorrect' lever was reinforced on 20% of trials. Each trial started with a 5 s ITI, followed by the  
565 illumination of the house-light and the insertion of both levers into the chamber. After a 'correct'  
566 response, both levers retracted but the house light remained illuminated. In case the rat was rewarded,  
567 the house light remained illuminated, whereas the house light extinguished in case the rat was not  
568 rewarded on the 'correct' lever. An 'incorrect' response or a failure to respond within 30 s after lever  
569 insertion (i.e. omission) lead to the retraction of both levers, extinction of the house light so that the  
570 chamber returned to its ITI state. When the rat made a string of 8 consecutive trials on the 'correct'  
571 lever (regardless of whether they were rewarded or not), contingencies were reversed, meaning the  
572 'correct' lever became the 'incorrect' lever and the previously 'incorrect' lever became the 'correct'

573 lever. This pattern repeated over the course of a daily session. Daily sessions were completed upon  
574 performing 200 trials or after 60 minutes have passed, whichever occurred first.  
575 *Trial-by-trial analysis:* This analysis was performed to assess the shifts in choice behavior between  
576 subsequent trials, in order to investigate the sensitivity to positive and negative feedback. Depending on  
577 whether the rat received a reward or not, it can press the same lever on the subsequent trial or shift  
578 towards the other lever, resulting in 4 different choices (i.e. win-stay, win-shift, lose-stay, lose-shift) for  
579 both the 'correct' and 'incorrect' lever. We calculated these choices (win-stay vs win-shift and lose-stay  
580 vs lose-shift) as percentages per session.

581 *Normalization:* The PRL task was performed twice with two different batches of animals. The first batch  
582 consisted of 12 CTL and 12 SPD animals. The second batch consisted of three groups of 12 rats (CTL, SPD  
583 and SPD1h). For the number of reversals we used the following normalization using the minimum and  
584 maximum values (*groupmin*, *groupmax*) per group:

$$585 \quad x' = \frac{x - \textit{groupmin}}{\textit{groupmax} - \textit{groupmin}}$$

586 Where *x* is the original individual value and *x'* is the normalized value. To compare the win-stay and lose-  
587 shift choices per session, we normalized the SPD and SPD1h data to the average of their respective  
588 control group.

589

## 590 **Computational Modelling**

591 Eight different computational models were fit to the trial-by-trial responses to assess differences in task  
592 strategy between the three groups of animals. Best-fit model parameters were estimated using  
593 maximum likelihood estimation, using Matlab (version 2018b; The MathWorks Inc.) function 'fmincon'  
594 (Verharen et al., 2018). These maximum likelihood estimates were corrected for model complexity (i.e.,  
595 the number of free parameters ( $n_f$ )) by calculating the Akaike information criterion (AIC) for each  
596 session:

597

598  $AIC = 2*(n_f) - 2*\log(\text{likelihood})$

599

600 In which a lower AIC indicates more evidence in favor of the model. These log-model evidence estimates  
601 were subsequently used to perform Bayesian model selection (Rigoux et al., 2014) using the Matlab  
602 package SPM12 (The Wellcome Centre for Human Neuroimaging), taking into account the family to  
603 which each model belonged (Penny et al., 2010). This yielded the protected exceedance probability for  
604 the 8 individual models and for each family of models (random choice, heuristic and Q learning family) ,  
605 indicating the probability that each of the (family of) models was most prevalent among the group of  
606 rats.

607

608 Table 1 contains an overview of the eight computational models. The random choice model is the null  
609 model, which assumes that animals choose randomly (i.e.,  $p = 0.5$  for each choice, so that the log  
610 likelihood is given by  $[\text{number of trials}] * \log(0.5)$ ). The second family of models contained strategies  
611 based on 'heuristics'; simple strategies to complete the task. The third family contained Q learning  
612 models, consisting of four derivatives of the Rescorla-Wagner model (Rescorla and Wagner, 1972).

613

614 *Table 1 – Overview of computational models*

| <b>Model family</b> | <b>#</b> | <b>Model name</b>     | <b><math>n_f</math></b> | <b>Description</b>                                                                    |
|---------------------|----------|-----------------------|-------------------------|---------------------------------------------------------------------------------------|
| Random choice       | 1        | Random choice model   | 0                       | Animal chooses randomly                                                               |
| Heuristics family   | 2        | Win-Stay, Lose-Switch | 1                       | Animal stays on the same lever after winning, moves away from the lever after a loss. |
|                     | 3        | Win-Stay, Lose-Random | 1                       | Animal stays on the same lever after winning, randomly picks a lever after a loss.    |

|                   |   |                                                                        |   |                                                                                                                                                                                                                  |
|-------------------|---|------------------------------------------------------------------------|---|------------------------------------------------------------------------------------------------------------------------------------------------------------------------------------------------------------------|
|                   | 4 | Random choice + stickiness                                             | 2 | Animal chooses randomly but attributes value to the lastly chosen lever (Verharen et al., 2020).                                                                                                                 |
| Q learning family | 5 | Q learning, single learning rate for reward and punishment learning    | 2 | Animal learns from previous decisions. Learning rate for positive and negative feedback are the same (Verharen et al., 2020).                                                                                    |
|                   | 6 | Q learning, separate learning rates for reward and punishment learning | 3 | Animal learns from previous decisions. Learning rate for positive and negative feedback may differ (Verharen et al., 2020).                                                                                      |
|                   | 7 | Model 6 + stickiness parameter                                         | 4 | Animal learns from previous decisions. Learning rate for positive and negative feedback are separately calculated. Additionally, the animal attributes value to the lastly chosen lever (Verharen et al., 2020). |
|                   | 8 | Rescorla-Wagner Pearce Hall                                            | 4 | Animal learns from previous decisions. Learning rate for positive and negative feedback are the same. Additionally, the animal may learn better when task volatility is higher (e.g., after a reversal).         |

615

## 616 **Electrophysiological analysis**

617 The electrophysiology experiments were performed twice with two batches of different animals. The  
618 first batch consisted of 12 CTL and 12 SPD animals. The second batch consisted of three groups of 12  
619 (CTL, SPD and SPD1h). *Slice preparation*: Rats (12-15 weeks of age) were anesthetized by intraperitoneal  
620 injection of sodium pentobarbital (batch 1) or induction with isoflurane (batch 2) and then transcardially  
621 perfused with ice-cold modified artificial cerebrospinal fluid (ACSF) containing (in mM): 92 N-methyl-D-  
622 glutamine (NMDG), 2.5 KCl, 1.25 NaH<sub>2</sub>PO<sub>4</sub>, 30 NaHCO<sub>3</sub>, 20 HEPES, 25 glucose, 2 thiourea, 5 Na-  
623 ascorbate, 3 Na-pyruvate, 0.5 CaCl<sub>2</sub>·4H<sub>2</sub>O, and 10 MgSO<sub>4</sub>·7H<sub>2</sub>O, bubbled with 95% O<sub>2</sub> and 5% CO<sub>2</sub> (pH  
624 7.3–7.4). For batch 2 NMDG was replaced by choline chloride and thiourea was left out. Coronal slices of  
625 the medial PFC (300 μm) were prepared using a vibratome (Leica VT1200S, Leica Microsystems) in ice-  
626 cold modified ACSF. Slices were initially incubated in the carbogenated modified ACSF for 5-10 min at 34  
627 °C and then transferred into a holding chamber containing standard ACSF containing (in mM): 126 NaCl,  
628 3 KCl, 2 MgSO<sub>4</sub>, 2 CaCl<sub>2</sub>, 10 glucose, 1.25 NaH<sub>2</sub>PO<sub>4</sub> and 26 NaHCO<sub>3</sub> bubbled with 95% O<sub>2</sub> and 5% CO<sub>2</sub> (pH  
629 7.3) at room temperature for at least 30 minutes (2 MgSO<sub>4</sub> was replaced by 1.3 MgCl<sub>2</sub> in batch 2). They

630 were subsequently transferred to the recording chamber, perfused with standard ACSF that is  
631 continuously bubbled with 95% O<sub>2</sub> and 5% CO<sub>2</sub> at 28–32° C.

632 *Whole-cell recordings and analysis:* Whole-cell patch-clamp recordings were performed from layer 5  
633 pyramidal neurons in the medial PFC. These neurons were visualized with an Olympus BX61W1  
634 microscope using infrared video microscopy and differential interference contrast (DIC) optics. Patch  
635 electrodes were pulled from borosilicate glass capillaries and had a resistance of 3-6 MΩ when filled  
636 with intracellular solutions. Excitatory postsynaptic currents (EPSCs) were recorded in the presence of  
637 bicuculline (10 μM) and with internal solution containing (in mM): 140 K-gluconate, 1 KCl, 10 HEPES, 0.5  
638 EGTA, 4 MgATP, 0.4 Na<sub>2</sub>GTP, 4 Na<sub>2</sub>phosphocreatine (pH 7.3 with KOH). Inhibitory postsynaptic currents  
639 (IPSCs) were recorded in the presence of 6-cyano-7- nitroquinoxaline-2,3-dione (CNQX) (10 μM in batch  
640 1; 20 μM in batch 2) and D,L-2-amino-5-phosphopentanoic acid (D,L-AP5) (20 μM in batch 1; 50 μM in  
641 batch 2), with internal solution containing (in mM): 125 CsCl, 2 MgCl<sub>2</sub>, 5 NaCl, 10 HEPES, 0.2 EGTA, 4  
642 MgATP, 0.4 Na<sub>2</sub>GTP (pH 7.3 with CsOH; batch 1) or 70 K-gluconate, 70 KCl, 10 HEPES, 0.5 EGTA, 4  
643 MgATP, 0.4 Na<sub>2</sub>GTP, 4 Na<sub>2</sub>phosphocreatine (pH 7.3 with KOH; batch 2). Action-potential independent  
644 miniature IPSCs (mIPSCs) were recorded under the same conditions, but in the presence of 1 μM  
645 tetrodotoxin (TTX; Sigma) to block sodium channels. The membrane potential was held at -70 mV for  
646 voltage-clamp experiments. Signals were amplified, filtered at 3 kHz and digitized at 10 kHz using an  
647 EPC-10 patch-clamp amplifier with PatchMaster v2x73 software (batch 1) or MultiClamp 700B amplifier  
648 (Molecular Devices) with pClamp 10 software (batch 2). Series resistance was constantly monitored, and  
649 the cells were rejected from analysis if the resistance changed by >20%. No series resistance  
650 compensation was used. Resting membrane potential was measured in bridge mode (I=0) immediately  
651 after obtaining whole-cell access. The basic electrophysiological properties of the cells were determined  
652 from the voltage responses to a series of hyperpolarizing and depolarizing square current pulses. Input  
653 resistance was determined by the slope of the linear regression line through the voltage-current curve.

654 Passive and active membrane properties were analyzed with Clampfit 10 (Axon Instrument) or Matlab  
655 (Mathworks). Miniature and spontaneous synaptic currents (IPSCs and EPSCs) data were analyzed with  
656 Mini Analysis (Synaptosoft Inc., Decatur, GA). All events were detected with a criterion of a threshold  
657  $>3\times$  root-mean-square (RMS) of baseline noise. The detected currents were manually inspected to  
658 exclude false events.

659

660

### 661 **Immunohistochemistry**

662 *Tissue preparation:* Rats were anesthetized with Nembutal (i.p. 240mg/kg) and transcardially perfused  
663 with 0.1 M phosphatebuffered saline (PBS, pH 7.3-7.4) followed by 4% paraformaldehyde in 0.01 M PBS.  
664 The brains were removed from the skull and post-fixed overnight in the same paraformaldehyde  
665 solution at 4°C and subsequently cryoprotected in 30% sucrose for three days at 4°C. Thereafter, the  
666 brains were rapidly frozen in aluminum foil on dry ice and stored at  $-80^{\circ}\text{C}$  until further use. Brain  
667 sections (20  $\mu\text{m}$  thick) from the PFC between Bregma levels of 4.2 - 2.2mm were made with a Cryostat  
668 Leica CM 3050 S. Sections were stored at  $-80^{\circ}\text{C}$  until immunohistochemistry was performed. Brain slices  
669 were thawed and let dry for 1h at room temperature (RT). Slices were washed in PBS three times for 15  
670 min (3x15min) at RT. Sections were cooked in sodium citric acid buffer (SCAB, 10mM sodium citric acid  
671 in demi water, pH6) for 10 min at  $97^{\circ}\text{C}$  in a temperature controlled microwave, cooled for 30 min at  $4^{\circ}\text{C}$   
672 and washed again (3x15min in PBS). Slices were blocked with 400  $\mu\text{l}$  of blocking buffer (10% normal  
673 goat-serum, 0,2% triton-X 100 in PBS) for 2h in a wet chamber at RT. Slices were incubated overnight at  
674  $4^{\circ}\text{C}$  in the wet chamber with 250  $\mu\text{l}$  of primary antibodies in blocking buffer. Sections were washed  
675 (3x15min in PBS), followed by incubation with the secondary antibodies in blocking buffer for 2h at RT in  
676 a wet chamber. After another wash step (3x15min in PBS), slides were mounted and stored at  $4^{\circ}\text{C}$  until

677 image acquisition. Primary and secondary antibodies are listed in Table 2 (for cell density analysis) and

678 Table 3 (for synaptic puncta analysis).

679

680 *Table 2A - Primary antibodies for interneuron analysis*

| Host        | Epitope | Concentration | Company           | Order number |
|-------------|---------|---------------|-------------------|--------------|
| Rat         | Ctip2   | 1:1000        | Abcam             | ab18465      |
| Rabbit      | PV      | 1:1000        | Life technologies | PA1933       |
| Mouse IgG1  | NeuN    | 1:500         | Millipore         | MAB377       |
| Mouse IgG2a | GAD67   | 1:500         | Millipore         | MAB5406      |

681 *Table 2B - Secondary antibodies for interneuron analysis*

| Host | Epitope          | Fluorophore     | Concentration | Company           | Order number |
|------|------------------|-----------------|---------------|-------------------|--------------|
| Goat | Anti-rat         | Alexa Fluor 568 | 1:500         | Life technologies | A11077       |
| Goat | Anti-rabbit      | Alexa Fluor 405 | 1:500         | Life technologies | A31556       |
| Goat | Anti-mouse IgG1  | Alexa Fluor 647 | 1:500         | Life technologies | A21240       |
| Goat | Anti-mouse IgG2a | Alexa Fluor 488 | 1:500         | Life technologies | A21131       |

682 *Table 3A - Primary antibodies for synapse analysis*

| Host       | Epitope | Concentration | Company           | Order number |
|------------|---------|---------------|-------------------|--------------|
| Chicken    | VGAT    | 1:1000        | Synaptic systems  | 131006       |
| Rabbit     | PV      | 1:1000        | Life technologies | PA1933       |
| Guinea pig | NeuN    | 1:500         | Millipore         | ABN90        |
| Mouse      | CB1-R   | 1:1000        | Synaptic systems  | 258011       |

683 *Table 3B - Secondary antibodies for synapse analysis*

| Host | Epitope         | Fluorophore     | Concentration | Company           | Order number |
|------|-----------------|-----------------|---------------|-------------------|--------------|
| Goat | Anti-chicken    | Alexa Fluor 647 | 1:500         | Life technologies | A21449       |
| Goat | Anti-rabbit     | Alexa Fluor 405 | 1:500         | Life technologies | A31556       |
| Goat | Anti-guinea pig | Alexa Fluor 568 | 1:500         | Life technologies | A11075       |
| Goat | Anti-mouse      | Alexa Fluor 488 | 1:500         | Life technologies | A11029       |

684

685 *Image acquisition and analysis:* Images were taken with a Zeiss Confocal microscope (type LSM700). The  
686 investigator was blinded to the groups of the sections when acquiring the images and performing the  
687 quantifications. Image analysis was performed in ImageJ (National Institutes of Health USA).

688 *Cell density analysis:* z-stacks were acquired at 20x of all layers of the mPFC. Tile scan z-stacks (1600 x  
689 1280  $\mu\text{m}^2$ , 2  $\mu\text{m}$  steps, total of 10  $\mu\text{m}$ ) were acquired of the mPFC in both hemispheres of control (n=6)  
690 and SPD (n=6) rats. Antibodies staining for NeuN, Ctip2, GAD67 and PV were used. NeuN (neuronal  
691 nuclei) is a nuclear protein specific for neurons and was used as a marker to identify neurons. Expression  
692 of Ctip2 (CtBP (C-terminal binding protein) interacting protein) is restricted to L5/6 and was used to  
693 facilitate identification of the cortical layers., The GABA synthesis enzyme GAD67 (glutamate  
694 decarboxylase) and the calcium-buffering protein PV (parvalbumin) were used to identify inhibitory  
695 cells.

696 *Synapse analysis:* z-stacks were acquired at 63x in layer 5 of the mPFC. For each of the rat brains  
697 (Control (n=6), SPD (n=6)) z-stacks (102 x 102  $\mu\text{m}^2$ , 0.4  $\mu\text{m}$  steps, total of 12  $\mu\text{m}$ ) were acquired in both  
698 hemispheres. Image analysis was performed semi-automatically using custom-written ImageJ macros  
699 and MATLAB scripts. NeuN was used to determine the outline of individual L5 cell somata. VGAT  
700 (vesicular GABA transporter) is expressed in all inhibitory synapses and was used as a general inhibitory  
701 synaptic marker. For each L5 cell, a maximum intensity image was constructed from 4 z-stack slices,



702 which was median filtered and thresholded. Only synaptic puncta larger than 0.2  $\mu\text{m}$  and circularity of  
703 0.6-1.0 that were inside of the 1.5  $\mu\text{m}$  band around the NeuN outline were included. PV and CB1-R  
704 puncta were only included when co-localized with VGAT.

705

#### 706 **Data processing and statistical analyses**

707 Statistical analyses were performed with GraphPad Prism (Software Inc.) and RStudio 1\_2\_5019 (R  
708 version 3.6.1, R Foundation for Statistical Computing). Normality of the data was tested with a Shapiro-  
709 Wilk test. Differences between two groups were then tested with a nonparametric Mann-Whitney-  
710 Wilcoxon test (MW), or a parametric Welch t test (T). Differences between three groups were tested  
711 with an one-way ANOVA followed up with a Tukey's test. Behavior in the PRL was analyzed using two-  
712 way repeated measures ANOVA (with sessions as within-subjects factor and housing condition as  
713 between-subjects factor) was used for multiple comparisons followed by T-tests (with Bonferroni  
714 correction). Detailed statistical information of the figures is listed in the Statistical Table. All graphs  
715 represent the mean  $\pm$  standard error of the mean (SEM) with individual data points shown in colored  
716 circles.

717

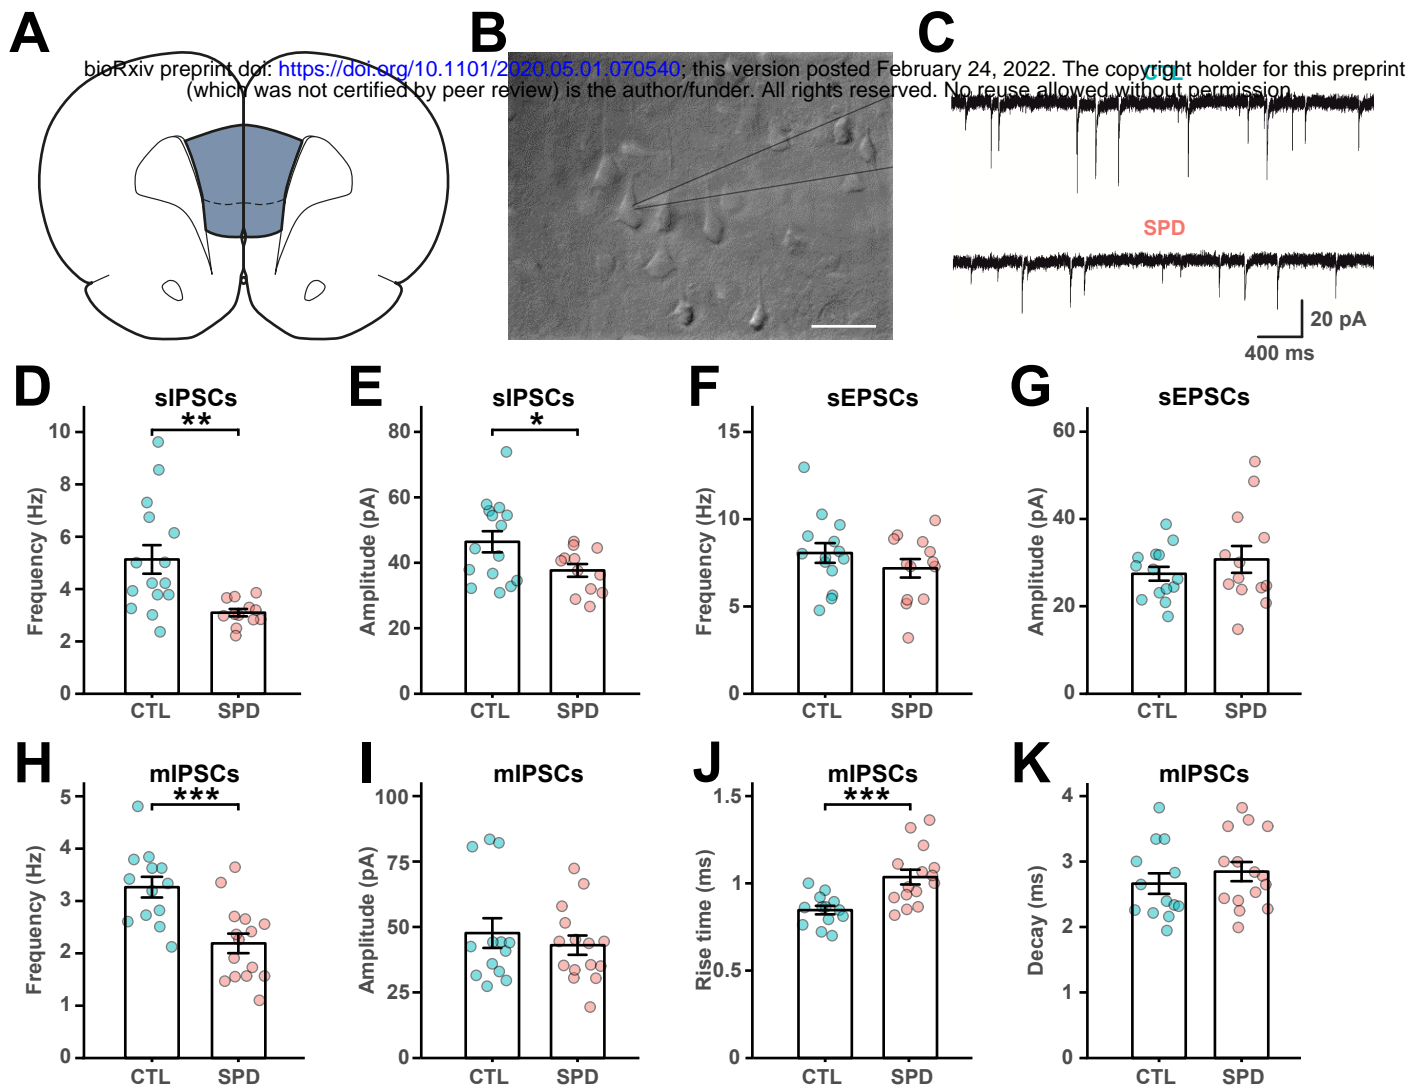

**Figure 1**  
Bijlsma et al.

**Figure 1. Reduced prefrontal inhibition in L5 pyramidal cells after social play deprivation**

(A) Schematic diagram depicting the recording site in the mPFC. (B) DIC image of L5 cells in the mPFC with the recording electrode (grey lines). Scale bar is 20  $\mu$ m. (C) Example traces of spontaneous IPSCs (sIPSCs) in L5 pyramidal cells in slices from control (CTL) and SPD rats. (D, E) Frequency (D) and amplitude (E) of sIPSCs in CTL and SPD slices ( $p = 0.002$  and  $p = 0.03$ ; T test). (F, G) Frequency (F) and amplitude (G) of spontaneous EPSCs ( $p = 0.27$  and  $p = 0.35$ ; T test). (H, I) Frequency (H) and amplitude (I) of miniature IPSCs ( $p < 0.0005$  and  $p = 0.50$ ; T test). (J) Rise time of mIPSCs ( $p = 0.0008$ ; T test). (K) Decay time of mIPSCs ( $p = 0.40$ ; T test). Data from 15 CTL and 13 SPD brain slices (6 rats per group). Statistical range: \*  $p < 0.05$ ; \*\*  $p < 0.01$ ; \*\*\*  $p < 0.001$

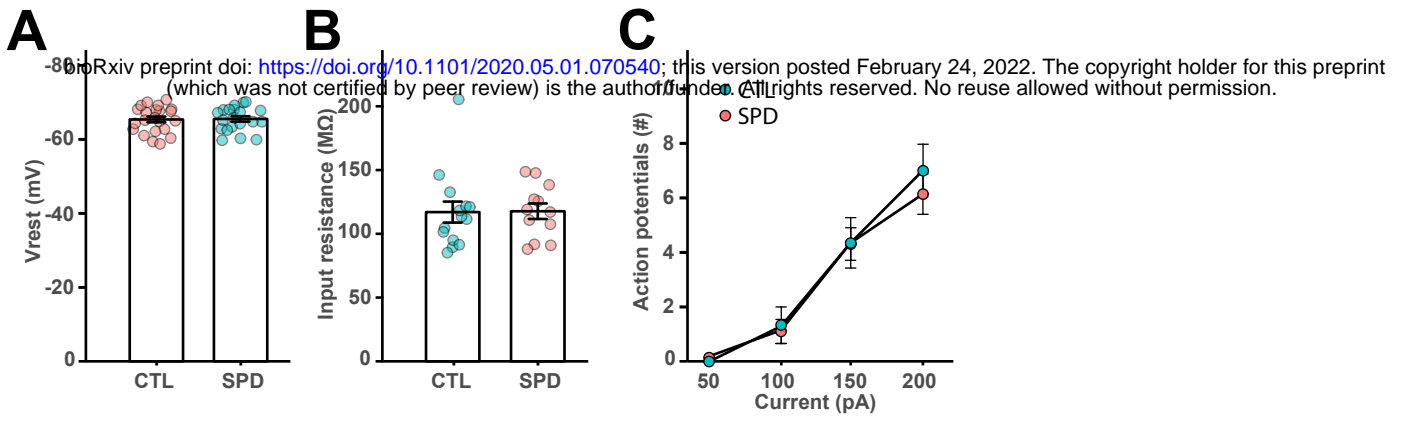

**Figure 2**  
Bijlsma et al.

**Figure 2. Passive membrane properties of L5 cells are similar in SPD and CTL slices**

(A) Resting potential of L5 pyramidal neurons in CTL and SPD slices ( $p = 0.97$ ; T test). (B) Input resistance ( $p = 0.61$ ; MW test). (C) Number of action potentials after current injections in CTL and SPD neurons ( $p = 0.58$ ; 2w ANOVA, condition). Data in A is from 20 CTL and 22 SPD cells; in B from 14 CTL and 12 SPD cells; in C from 19 CTL and 22 SPD cells.

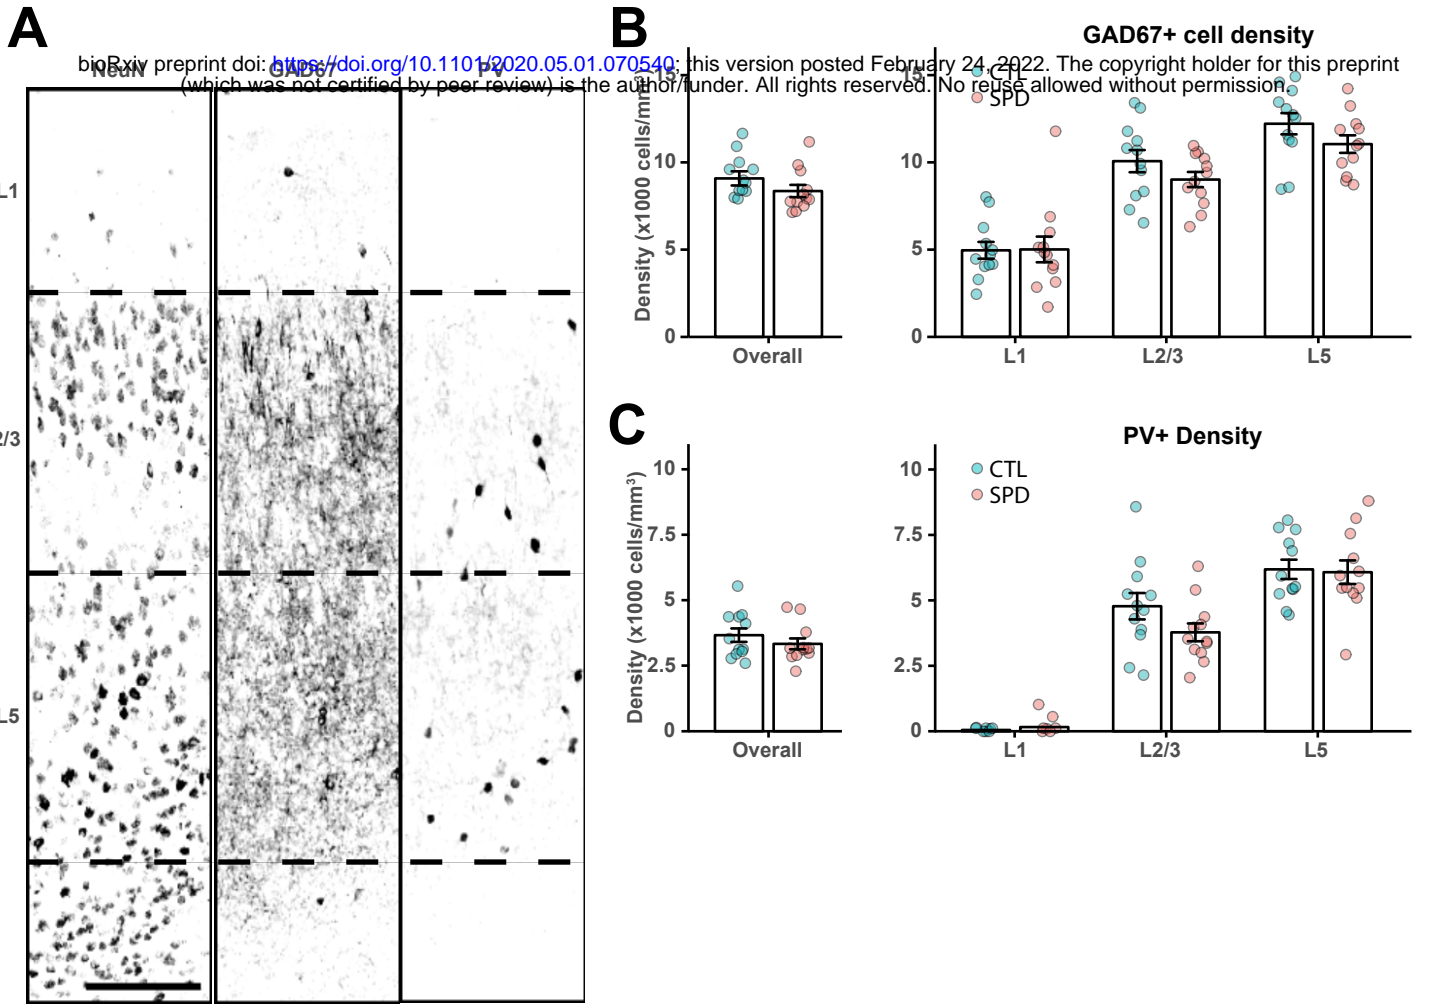

**Figure 3**  
Bijlsma et al.

**Figure 3. Interneuron density is similar in CTL and SPD tissue**

(A) Representative confocal image of NeuN, GAD67 and PV positive neurons in prelimbic cortex layers. Borders between layers are denoted by the dashed lines. Scale bar is 10  $\mu$ m.

(B) Left: The average density of GAD67-positive cells in the mPFC over all layers ( $p = 0.19$ ; T test); right: GAD67 cell density in Layer 1 ( $p = 0.95$ ; T test), Layer 2/3 ( $p = 0.19$ ; T test) and

Layer 5 ( $p = 0.15$ ; T test). (C) Left: The average density of PV-positive cells in the mPFC over all layers ( $p = 0.33$ ; T test); right: PV cell density in Layer 1 ( $p = 0.90$ ; MW test), Layer 2/3 ( $p = 0.12$ ; T test) and Layer 5 ( $p = 0.85$ ; T test). Data in B and C from 6 CTL and 6 SPD rats. For each rat two measurements (from both hemispheres) were included.

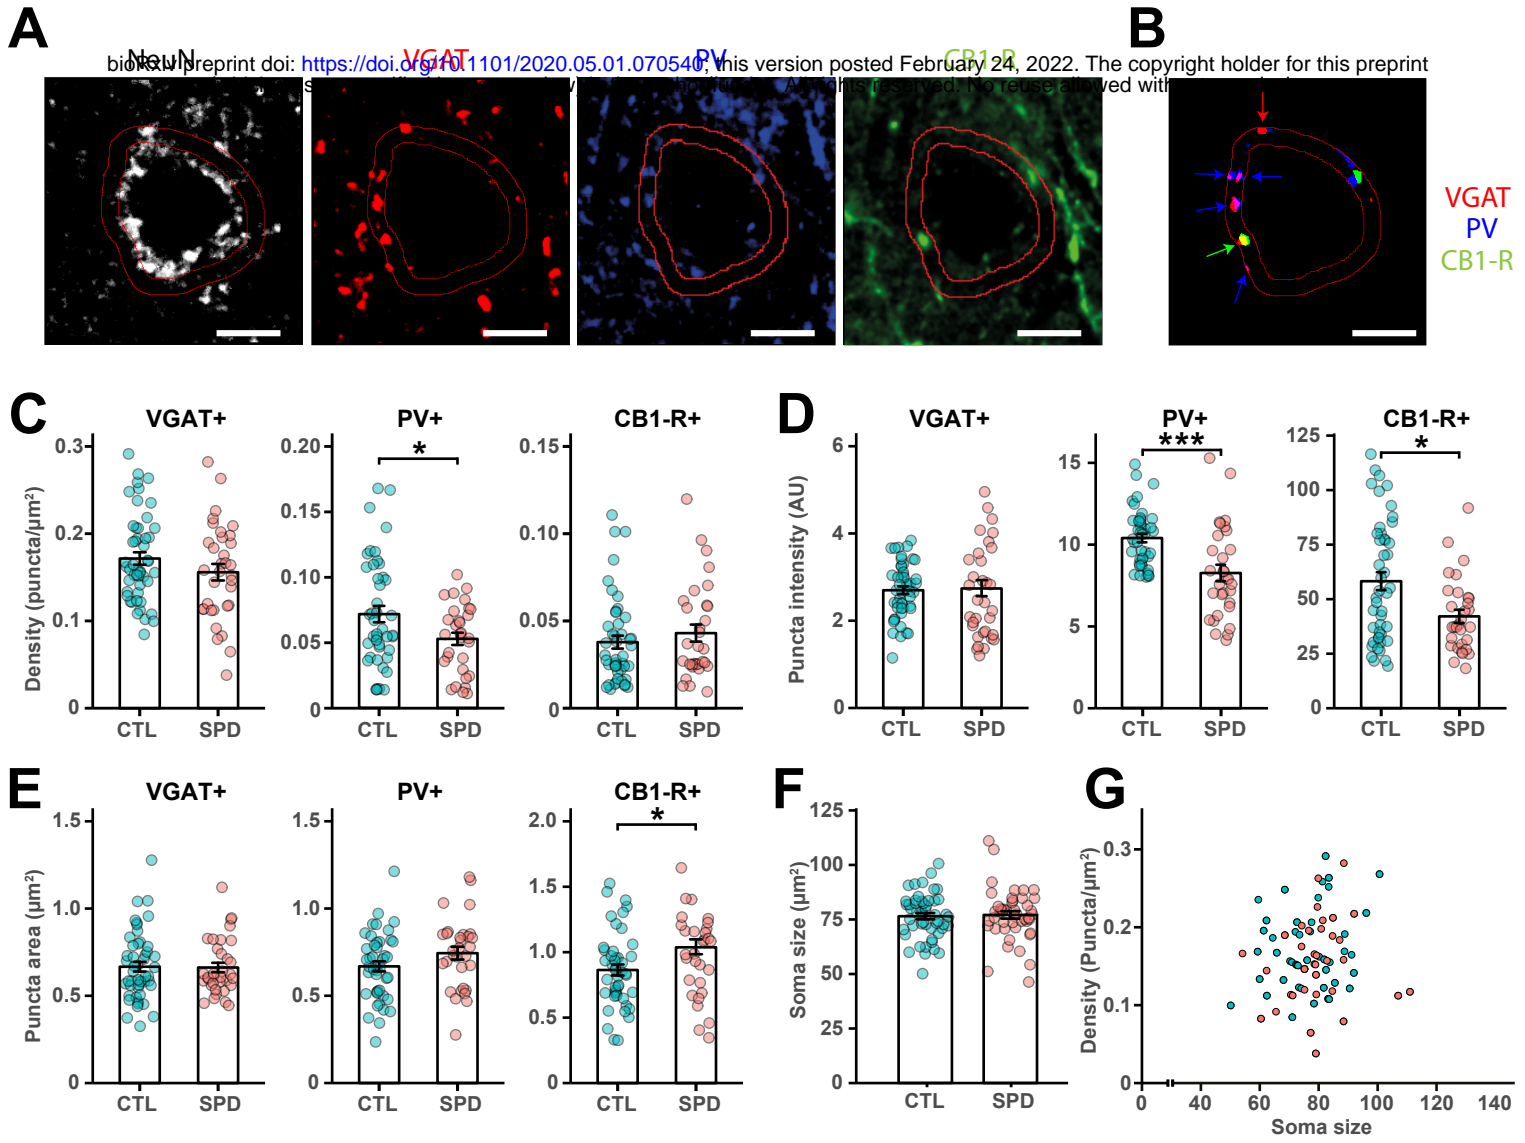

**Figure 4**  
Bijlsma et al.



**Figure 4. Reduction in perisomatic inhibitory synapses after SPD**

(A, B) Representative confocal images for VGAT, PV, CB1-R and NeuN immunostaining. Scale bar is 1  $\mu\text{m}$ . (C) A 1.5  $\mu\text{m}$  band around the soma was drawn based on the NeuN staining. Individual puncta were selected after thresholding Only PV and CB1-R puncta that co-localized with VGAT were considered synaptic puncta. (D) Summary of the selected VGAT, PV and CB1-R puncta from C. (E) The density of synaptic VGAT, PV and CB1-R puncta (VGAT  $p = 0.19$ ; PV  $p = 0.02$ ; CB1-R  $p = 0.36$ ) (F) The mean intensity of synaptic puncta (VGAT  $p = 0.51$ ; PV  $p < 0.0005$ ; CB1-R  $p = 0.02$ ) (G) The mean area of synaptic puncta (VGAT  $p = 0.93$ ; PV  $p = 0.12$ ; CB1-R  $p = 0.05$ ) (H) Soma size of L5 pyramidal cells ( $p = 0.20$ ; T test). (I) Correlation between L5 soma size and VGAT synaptic puncta density. Data in E-I from 49 CTL cells and 34 SPD cells (6 rats per group, 2 hemispheres). Statistical range: \*  $p < 0.05$ ; \*\*  $p < 0.01$ ; \*\*\*  $p < 0.001$ .

**A** bioRxiv preprint doi: <https://doi.org/10.1101/2020.05.01.070540>; this version posted February 24, 2022. The copyright holder for this preprint (which was not certified by peer review) is the author/funder. All rights reserved. No reuse allowed without permission.

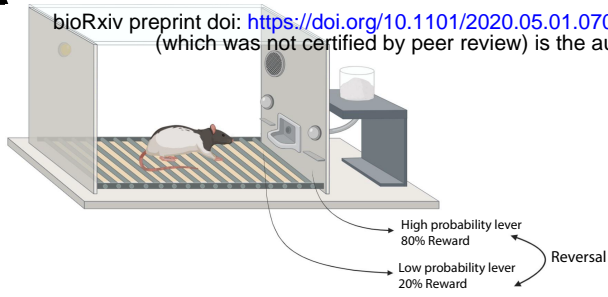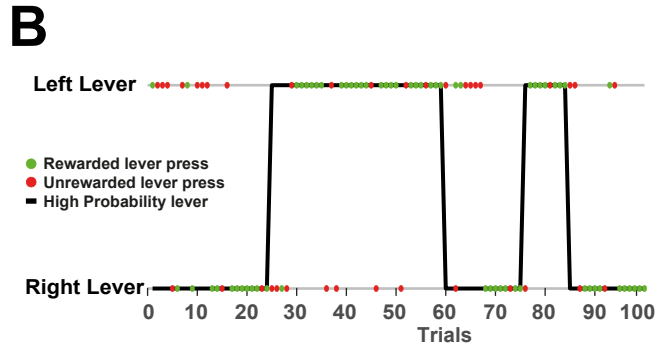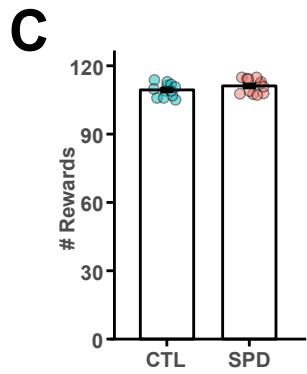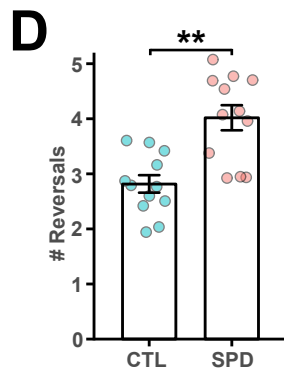

**Figure 5**  
Bijlsma et al.

**Figure 5. Altered PRL performance after SPD**

(A) Probabilistic reversal learning task design. Reversals occur when the rat has pressed the high probability lever 8 consecutive times. (B) Representation of the first 100 lever presses of an example rat during one of the sessions. Green and red dots represent rewarded and unrewarded lever presses respectively. A reversal is indicated by the change of the high probability lever (Trial 24, 59, 75 and 84). (C) Average number of rewards for CTL and SPD rats ( $p = 0.16$ ; T test). (D) Average number of reversals ( $p = 0.001$ ; T test). Data in C and D from 12 CTL and 12 SPD rats. Statistical range: \*\*  $p > 0.01$ .

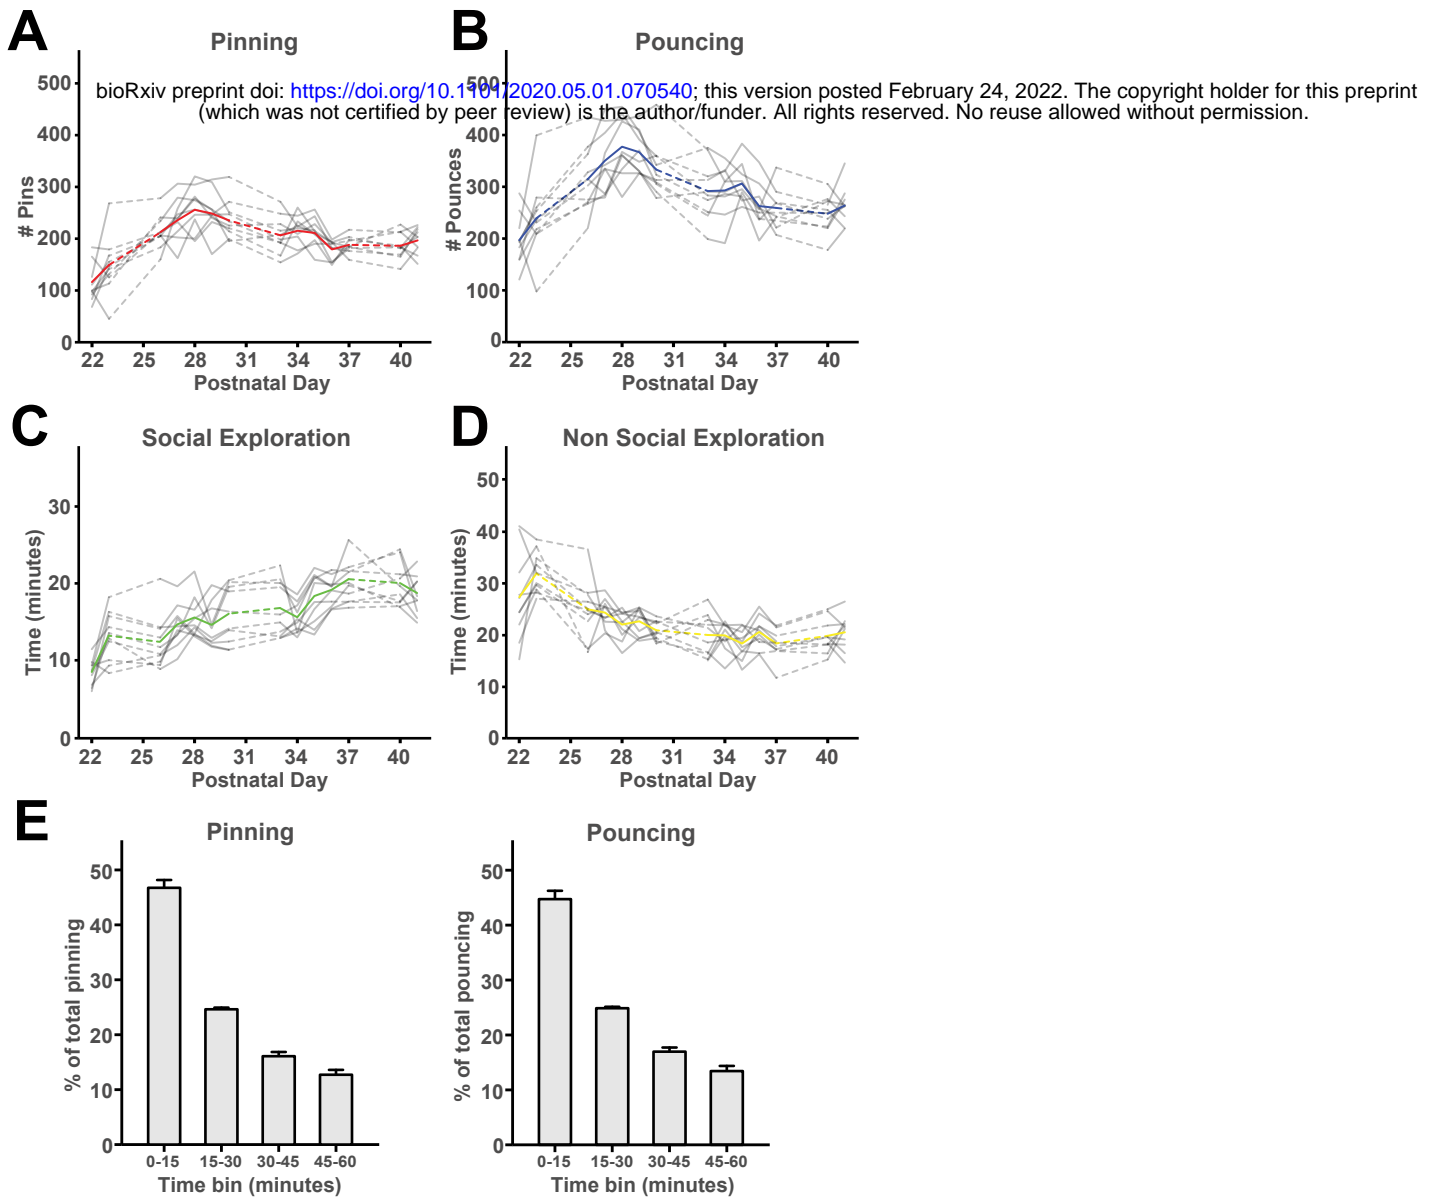

**Figure 6**  
 Bijlsma et al.

**Figure 6. Social behavior during 1-hour play sessions.**

(A, B) The frequency of (A) pinning and (B) pouncing of the SPD1h rats during the 1-hour play sessions per day. (C, D) The time spent in (C) social and (D) non-social exploration. Each grey line represents a pair of rats with the colored line representing the groups' average. (E, F) The behavioral readouts of social play are expressed as fraction of the total. For both (E) pinning and (F) pouncing, the amount was separated in bins of 15 mins (For statistics see statistical table 1). Data from 10 couples of SPD1h rats.

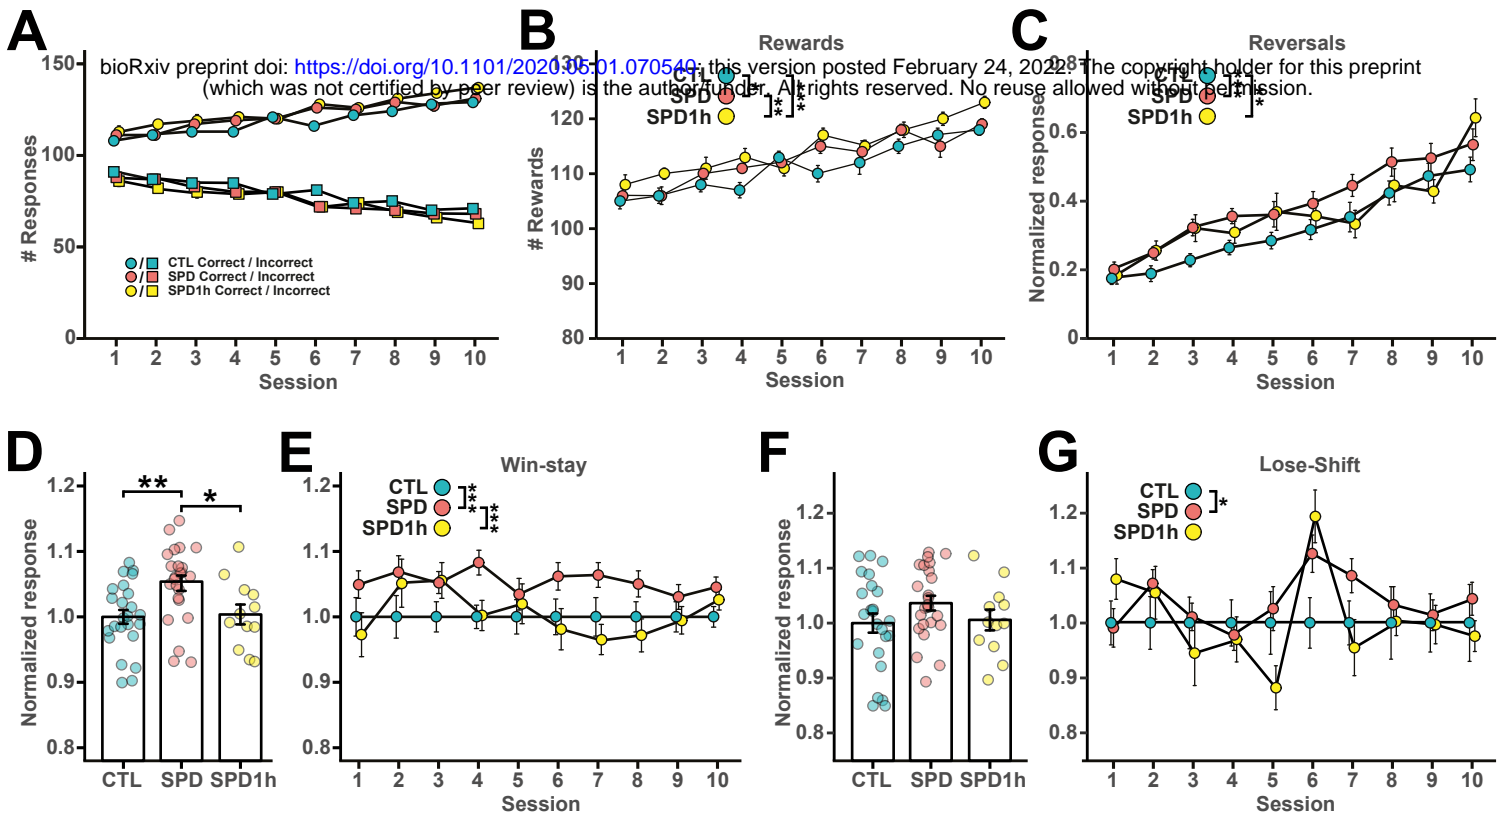

**Figure 7**  
Bijlsma et al.

**Figure 7. Behavioral analysis of altered PRL performance after SPD**

(A) Number of correct and incorrect lever presses per session for CTL, SPD and SPD1h rats.

(B) Number of sucrose rewards earned per session. (C) Normalized number of reversals per

session. (D) Normalized average win-stay responses. (E) Normalized win-stay responses per

session. (F) Normalized average lose-shift responses. (G) Normalized lose-shift responses per

session. For statistics see statistical table 1. Data from 24 CTL, 24 SPD and 12 SPD1h rats

(including CTL and SPD rats from fig. 5). Statistical range: \*  $p < 0.05$ ; \*\*  $p < 0.01$ ; \*\*\*  $p < 0.001$

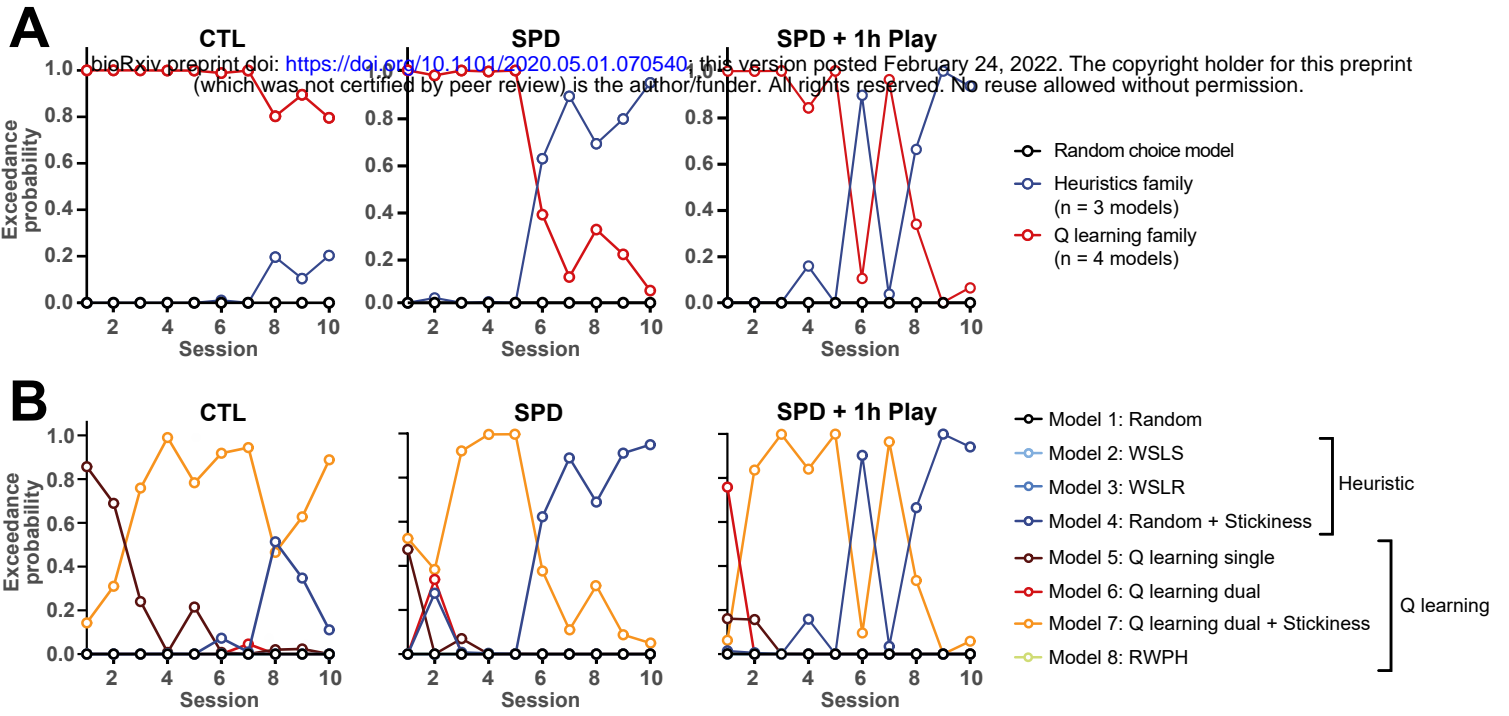

**Figure 8**  
Bijlsma et al.



**Figure 8. Trial-by-trial analysis of PRL performance.**

(A) Exceedance probability for different families of computational models (Random choice, Heuristics and Q-learning families) based on Bayesian model selection for the three groups (CTL, SPD and SPD1h rats). (B) Exceedance probability for random and specific heuristic (Win-stay/Lose-shift (WSLS), Win-stay/Lose-random (WSLR), Random + stickiness) and Q-learning family models (Q-Learning single, dual, dual + stickiness, Rescorla-Wagner-Pearce-Hall (RWPH)).

**A**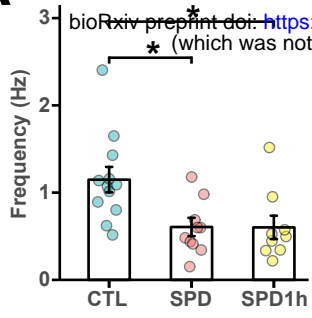**B**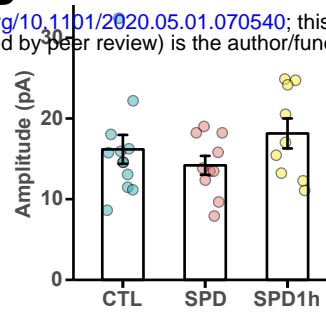

**Figure 9**  
Bijlsma et al.

**Figure 9. Reduced prefrontal inhibition in L5 pyramidal cells in SPD and SPD1h slices.**

(A) Frequency of mIPSCs in CTL, SPD and SPD1h slices (ANOVA  $p=0.0049$ , Tukey's: CTL vs SPD  $p = 0.011$ ; CTL vs SPD1h  $p = 0.017$ ; SPD vs SPD1h  $p = 0.99$ ). (B) Amplitude of mIPSCs in CTL, SPD and SPD1h slices (ANOVA  $p = 0.29$ ). Data from 12 CTL, 10 SPD and 9 SPD1h cells (6 rats per group). Statistical range: \*  $p < 0.05$ .
